# Supplementary material for: Diatoms as indicators of the effects of river impoundment at multiple spatial scales
Source: PeerJ journal article supplement (doi:10.7717/peerj.8092), 2019-11-27
Supplement: AppendixB_IndSpec.pdf [file AppendixB_IndSpec.pdf]

Appendix B Indicator diatom taxa for downstream (DS) and control sites (C) for the separate regions and seasons.

Guilds: L = low-profile, H = high-profile, M = motile

| Taxon                             | Guild | North England |        | Yorkshire Dales |        | South Pennines |        | NE Peak District |        | SW Peak District |        | Midlands |        |
|-----------------------------------|-------|---------------|--------|-----------------|--------|----------------|--------|------------------|--------|------------------|--------|----------|--------|
|                                   |       | spring        | autumn | spring          | autumn | spring         | autumn | spring           | autumn | spring           | autumn | spring   | autumn |
| Achnanthydium pyrenaicum          | L     |               | DS     |                 |        |                |        |                  |        |                  |        |          |        |
| Amphora pediculus type            | L     |               | DS     |                 |        | DS             | DS     | DS               | DS     |                  |        |          |        |
| Cocconeis lineata                 | L     |               |        |                 | DS     |                | DS     |                  |        |                  |        |          |        |
| Cocconeis pediculus               | L     |               |        |                 | DS     |                |        |                  |        |                  |        |          |        |
| Cocconeis placentula agg.         | L     |               | DS     |                 |        |                |        | DS               | DS     |                  |        |          |        |
| Diatoma mesodon                   | H     |               | DS     |                 |        |                | DS     |                  |        |                  | DS     |          |        |
| Diatoma moniliformis              | H     |               |        | DS              | DS     |                |        | DS               | DS     |                  |        |          |        |
| Diatoma problematica              | H     |               |        | DS              | DS     | DS             | DS     | DS               | DS     | DS               |        |          |        |
| Diatoma vulgare agg.              | H     |               |        |                 |        |                |        |                  |        | DS               |        |          |        |
| Encyonema minutum                 | H     | DS            |        | DS              | DS     | DS             | DS     | DS               | DS     |                  |        | DS       |        |
| Encyonema silesiacum              | H     |               |        |                 |        |                |        |                  | DS     |                  |        | DS       |        |
| Eolimna minima                    | M     | DS            | DS     |                 |        | DS             |        |                  |        |                  |        |          |        |
| Eunotia bilunaris                 | H     |               |        |                 |        | C              | C      | C                |        |                  |        |          |        |
| Eunotia exigua                    | H     | C             |        |                 |        | C              | C      | C                | C      |                  |        |          |        |
| Eunotia formica                   | H     |               |        |                 |        |                |        |                  |        |                  | DS     |          |        |
| Eunotia incisa                    | H     |               |        |                 |        |                |        | C                |        |                  |        |          |        |
| Eunotia meisteri                  | H     |               |        |                 |        |                |        | C                |        |                  |        |          |        |
| Eunotia minor                     | H     |               |        |                 |        |                | C      | C                | C      |                  |        |          |        |
| Eunotia muscicola                 | H     |               |        |                 |        |                |        | C                |        |                  |        |          |        |
| Eunotia muscicola var. tridentula | H     |               |        |                 |        |                |        | C                | C      |                  |        |          |        |
| Eunotia subarcuatoides            | H     | C             |        |                 |        |                |        |                  |        |                  |        |          |        |
| Fallacia subhamulata              | M     |               |        |                 |        |                |        |                  |        |                  |        |          | C      |
| Fragilaria bidens                 | H     |               |        |                 |        |                | DS     | DS               |        |                  |        |          |        |
| Fragilaria capucina               | H     |               |        |                 |        |                |        | DS               |        |                  |        |          |        |
| Fragilaria mesolepta              | H     |               | DS     |                 |        |                |        |                  |        |                  |        |          |        |
| Fragilaria vaucheriae             | H     |               |        |                 |        | DS             | DS     |                  | DS     |                  |        |          | DS     |
| Fragilariforma bicapitata         | H     |               |        |                 |        |                |        |                  | DS     |                  | DS     |          |        |
| Frustulia rhomboides              | H     |               |        |                 |        | C              | C      |                  | C      |                  |        |          |        |
| Frustulia saxonica                | H     |               |        |                 |        |                |        |                  | C      |                  |        |          |        |
| Gomphonema angustatum             | H     |               |        |                 |        | C              |        |                  |        |                  |        |          |        |
| Gomphonema exilissimum            | H     |               |        |                 |        |                |        | C                |        |                  |        |          |        |
| Gomphonema minutum                | H     |               |        | C               |        |                | DS     |                  |        |                  |        |          |        |
| Gomphonema olivaceoides           | H     |               |        |                 | C      |                |        |                  |        |                  |        |          |        |
| Gomphonema truncatum              | H     |               | DS     |                 |        | DS             |        |                  | DS     |                  |        |          |        |
| Hannaea arcus                     | L     |               |        |                 |        | DS             |        |                  | DS     |                  |        |          |        |
| Karayevia clevei                  | L     |               |        |                 |        |                |        |                  |        |                  |        |          | DS     |
| Karayevia oblongella              | L     |               |        |                 |        |                |        | C                |        |                  |        |          |        |
| Mayamaea atomus var. permitis     | M     |               |        |                 |        |                |        |                  |        | C                |        |          |        |
| Melosira varians                  | H     |               | DS     |                 | DS     |                | DS     | DS               | DS     | DS               | DS     |          |        |
| Meridion circulare                | L     | DS            |        |                 |        |                |        |                  |        |                  |        |          |        |
| Navicula cryptocephala            | M     |               | DS     |                 | DS     |                | DS     |                  | DS     |                  |        |          | C      |
| Navicula cryptotenella            | M     |               |        |                 | DS     |                |        |                  | DS     |                  | DS     |          |        |
| Navicula gregaria                 | M     |               | DS     |                 |        |                |        | DS               | DS     |                  |        |          |        |
| Navicula lanceolata               | M     |               |        |                 |        | DS             |        |                  | DS     |                  |        |          |        |
| Navicula radiosa                  | M     |               |        |                 | DS     |                |        |                  |        |                  |        |          |        |
| Navicula reichardtiana            | M     |               |        |                 |        |                |        |                  | DS     |                  |        |          |        |
| Navicula rhynchocephala           | M     |               |        |                 |        |                |        | DS               |        |                  |        |          |        |
| Nitzschia amphibia                | M     |               |        |                 |        |                |        |                  |        |                  |        |          | DS     |
| Nitzschia capitellata             | M     |               |        |                 |        |                | DS     |                  | DS     |                  |        |          |        |
| Nitzschia dissipata               | M     | DS            | DS     |                 | DS     |                | DS     | DS               | DS     |                  | DS     |          |        |
| Nitzschia fonticola               | M     |               | DS     |                 |        |                | DS     |                  | DS     | DS               | DS     | DS       |        |
| Nitzschia frustulum               | M     |               |        |                 |        |                |        |                  | DS     |                  |        | DS       |        |
| Nitzschia heufferiana             | M     |               |        |                 | DS     |                |        |                  |        |                  |        |          |        |
| Nitzschia inconspicua             | M     |               |        |                 |        | DS             | DS     |                  | DS     |                  |        |          |        |
| Nitzschia linearis                | M     |               |        |                 |        |                |        | DS               |        |                  |        |          | C      |
| Nitzschia palea                   | M     | DS            |        |                 |        |                | DS     | DS               | DS     |                  |        |          |        |
| Nitzschia paleacea                | M     |               |        |                 |        |                |        |                  | DS     |                  |        |          |        |
| Nitzschia perminuta               | M     |               |        |                 |        |                |        |                  | DS     |                  |        |          |        |
| Nitzschia recta                   | M     |               |        |                 | DS     | DS             | DS     |                  |        |                  |        |          |        |
| Nitzschia sociabilis              | M     |               |        |                 |        |                |        | DS               | DS     |                  |        | C        | C      |
| Nitzschia tubicola                | M     |               |        |                 |        |                |        |                  | DS     |                  |        |          |        |
| Peronia fibula                    | H     | C             |        |                 |        |                |        |                  |        |                  |        |          |        |
| Pinnularia appendiculata          | M     |               |        |                 |        |                |        | C                | C      |                  |        |          |        |
| Pinnularia subcapitata            | M     |               |        |                 |        | C              | C      | C                | C      |                  |        |          |        |
| Planothidium frequentissimum      | L     |               |        |                 |        |                | DS     |                  | DS     |                  |        |          |        |
| Planothidium lanceolatum          | L     |               | DS     |                 |        | DS             | DS     | DS               |        |                  |        |          |        |
| Platessa conspicua                | L     |               |        |                 |        |                |        |                  |        |                  |        |          | DS     |
| Pseudostaurosira brevistriata     | H     |               |        |                 |        |                |        |                  |        |                  |        | DS       |        |
| Reimeria sinuata                  | L     |               |        |                 |        |                |        |                  |        |                  | C      |          |        |
| Staurosirella leptostauron        | H     |               |        |                 |        |                |        |                  | DS     |                  |        |          |        |
| Surirella angusta                 | M     |               |        |                 |        |                |        |                  | DS     |                  |        |          |        |
| Surirella brebissonii             | M     |               |        |                 |        |                |        |                  | DS     |                  | DS     |          | C      |
| Tabellaria fenestrata             | H     |               |        |                 |        |                |        |                  | DS     |                  |        |          |        |
| Tabularia fasciculata             | H     |               |        |                 |        |                |        |                  |        |                  |        | DS       |        |
| Ulnaria ulna                      | H     | DS            |        |                 |        |                | DS     | DS               |        |                  |        |          |        |

| Indicator taxa summary |                       | North England |        | Yorkshire Dales |        | South Pennines |        | NE Peak District |        | SW Peak District |        | Midlands |        |
|------------------------|-----------------------|---------------|--------|-----------------|--------|----------------|--------|------------------|--------|------------------|--------|----------|--------|
|                        |                       | spring        | autumn | spring          | autumn | spring         | autumn | spring           | autumn | spring           | autumn | spring   | autumn |
|                        | Control sites (C )    | 3             | 0      | 1               | 1      | 5              | 5      | 11               | 7      | 1                | 1      | 1        | 5      |
|                        | Downstream sites (DS) | 6             | 13     | 3               | 12     | 11             | 29     | 16               | 31     | 4                | 8      | 6        | 4      |
