# Supplementary material for: Diatoms as indicators of the effects of river impoundment at multiple spatial scales
Source: PeerJ journal article supplement (doi:10.7717/peerj.8092), 2019-11-27
Supplement: Diatom_SHEBAM_rawdata.xlsx [file Diatom_SHEBAM_rawdata.xlsx]

## Sheet: readme
Guide to columns
BIOSYS.ID	Sample site ID (n=68)
region	Region as used in the study (n=6)
res.cluster	Reservoir group (n=34)
site.type	Site type ('downstream' or 'control')
SAMPLE_ID	Unique sample ID (n=477)
SAMPLE_DATE	Date of sampling
TDI3	Trophic Diatom Index (version 3) score
Licensing information
This dataset was provided by the Environment Agency of England under the UK Open Government Licence for public sector information - please see link below
http://www.nationalarchives.gov.uk/doc/open-government-licence/version/3/

## Sheet: Diatom_PeerJ_rawdata
BIOSYS.ID	region	res.cluster	site.type	SAMPLE_ID	SAMPLE_DATE	TDI3	Achnanthes coarctata	Achnanthes exigua	Achnanthes kryophila	Achnanthes suchlandtii	Achnanthidium caledonicum	Achnanthidium microcephalum	Achnanthidium minutissimum type	Achnanthidium pyrenaicum	Achnanthidium subatomus	Actinocyclus sp.	Adlafia bryophila	Adlafia minuscula	Adlafia suchlandtii	Amphipleura pellucida	Amphora copulata	Amphora inariensis	Amphora ovalis	Amphora pediculus type	Asterionella formosa	Aulacoseira	Brachysira brebissonii	Brachysira neoexilis	Brachysira procera	Brachysira serians	Brachysira vitrea type	Caloneis amphisbaena	Caloneis bacillum	Caloneis silicula	Cavinula	Cocconeis diminuta	Cocconeis disculus	Cocconeis lineata	Cocconeis neothumensis	Cocconeis pediculus	Cocconeis placentula agg.	Cocconeis pseudothumensis	Craticula accomoda	Craticula halophila	Craticula minusculoides	Craticula molestiformis	Craticula subminuscula	Craticula submolesta	Ctenophora pulchella
65118	Yorkshire Dales	49	control	653969	2013-04-03	17.48	0	0	0	0	0	0	256	1	0	0	0	0	0	0	0	0	0	0	0	0	0	0	0	0	0	0	0	0	0	0	0	0	0	0	0	0	0	0	0	0	0	0	0
51392	Midlands	40	downstream	654398	2013-04-08	60.03	0	0	0	0	0	0	12	0	0	0	0	2	0	0	0	0	0	12	0	0	0	0	0	0	0	0	0	0	0	0	0	0	0	0	13	0	0	0	0	1	4	0	0
64262	North England	47	downstream	654544	2013-04-08	17.11	0	0	0	0	0	0	52	0	0	0	0	0	0	0	0	0	0	0	0	0	0	0	0	0	0	0	0	0	0	0	0	1	0	0	0	0	0	0	0	0	0	0	0
1594	Yorkshire Dales	17	downstream	656087	2013-04-16	28.32	0	0	0	0	0	0	70	0	0	0	0	0	0	0	0	0	0	0	0	0	0	0	0	0	0	0	0	0	0	0	0	0	0	0	0	0	0	0	0	0	0	0	0
465	Yorkshire Dales	8	downstream	656216	2013-04-18	18.21	0	0	0	0	0	0	141	0	0	0	0	0	0	0	0	0	0	0	0	0	0	0	0	0	0	0	0	0	0	0	0	0	0	0	0	0	0	0	0	0	0	0	3
254	South Pennines	61	downstream	656387	2013-04-19	24.82	0	0	0	0	0	0	103	0	0	0	0	0	0	0	0	0	0	2	0	1	0	0	0	0	0	0	0	0	0	0	0	0	0	0	3	0	0	0	0	0	0	0	0
69430	South Pennines	56	control	656470	2013-04-18	33.85	0	0	0	0	0	0	60	0	0	0	0	0	0	0	0	0	0	1	0	0	0	0	0	0	0	0	0	0	1	0	0	0	0	0	2	0	0	0	0	0	0	0	1
68458	South Pennines	56	downstream	656539	2013-04-22	40.09	0	0	0	0	0	0	24	0	0	0	0	0	0	0	0	0	0	1	3	5	0	0	0	0	0	0	0	0	0	0	0	0	0	0	0	0	0	0	0	0	0	0	0
22	Yorkshire Dales	65	control	657081	2013-04-24	25.29	0	0	0	0	0	0	225	0	0	0	0	0	0	0	0	0	0	0	0	0	0	0	0	0	0	0	0	0	0	0	0	0	0	0	0	0	0	0	0	0	0	0	0
163464	Yorkshire Dales	65	downstream	657157	2013-04-24	25.4	0	0	0	0	0	0	26	6	0	0	0	0	0	0	0	0	0	0	2	0	0	0	0	0	0	0	0	0	0	0	0	0	0	0	0	0	0	0	0	0	0	0	4
152682	Yorkshire Dales	7	downstream	657273	2013-04-24	28.81	0	0	0	0	0	0	165	0	0	0	0	0	0	0	0	0	0	3	0	0	0	0	0	0	0	0	0	0	0	0	0	2	0	0	0	0	0	0	0	0	0	0	2
936	Yorkshire Dales	7	control	657275	2013-04-24	63.41	0	0	0	0	0	0	59	1	0	0	0	0	0	0	0	0	0	6	0	0	0	0	0	0	0	0	0	0	0	0	0	0	0	0	0	0	0	0	0	0	0	0	0
69134	South Pennines	51	downstream	657526	2013-04-22	45.11	0	0	0	0	0	0	32	0	0	0	0	0	0	0	0	0	0	4	0	0	0	0	0	0	0	0	0	0	0	0	0	0	0	0	0	0	0	0	0	0	0	0	0
67595	North East Peak District	53	downstream	657535	2013-04-25	14.26	0	0	0	0	0	0	6	0	0	0	0	0	0	0	0	0	0	0	0	0	0	0	0	0	0	0	0	0	0	0	0	0	0	0	0	0	0	0	0	0	0	0	0
46924	South West Peak District	36	downstream	657588	2013-04-26	17.63	0	0	0	0	0	0	34	2	0	0	0	0	0	0	0	0	0	0	0	0	0	0	0	0	0	0	0	0	0	0	0	0	0	0	0	0	0	0	0	0	0	0	4
97161	South West Peak District	36	control	657591	2013-04-26	15.48	0	0	0	0	0	0	139	0	0	0	0	0	0	0	0	0	0	0	0	0	0	0	0	0	0	0	0	0	0	0	0	0	0	0	0	0	0	0	0	0	0	0	4
1758	North England	18	downstream	657635	2013-04-29	26.97	0	0	0	0	0	0	132	0	0	0	0	0	0	0	0	0	0	0	1	5	0	0	0	0	0	0	0	0	0	0	0	0	0	0	1	0	0	0	0	0	0	0	0
1759	North England	18	control	657649	2013-04-29	19.46	0	0	0	0	0	0	230	0	0	0	0	0	0	0	0	0	0	0	0	0	0	0	0	0	1	0	0	0	0	0	0	0	0	0	0	0	0	0	0	0	0	0	0
51065	Midlands	38	control	657879	2013-04-29	58.52	0	0	0	0	0	0	9	0	0	0	0	2	0	0	1	0	0	2	0	0	0	0	0	0	0	0	0	6	0	0	0	0	0	0	0	0	1	0	0	0	0	0	1
1584	North East Peak District	13	downstream	657928	2013-04-30	27.33	0	0	0	0	0	0	302	0	0	0	0	0	0	0	0	0	0	0	0	0	0	0	0	0	0	0	0	0	0	0	0	9	0	0	1	0	0	0	0	0	0	0	0
75896	North East Peak District	13	control	657929	2013-04-30	6.34	0	0	0	0	0	0	64	0	0	0	0	0	0	0	0	0	0	0	0	0	0	0	0	0	0	0	0	0	0	0	0	0	0	0	0	0	0	0	0	0	0	0	0
50031	Midlands	40	control	658053	2013-05-01	60.87	0	0	0	0	0	0	79	0	0	0	0	0	0	0	0	0	0	64	0	0	0	0	0	0	0	0	1	0	0	0	0	2	0	0	8	0	0	0	0	0	1	0	0
52186	South West Peak District	42	control	658158	2013-04-30	47.77	0	0	0	0	0	0	81	0	0	0	0	0	0	0	0	0	0	1	0	0	0	0	0	0	0	0	0	0	0	0	0	0	0	0	0	0	0	0	0	0	0	0	0
67130	South West Peak District	54	downstream	658394	2013-05-01	42.94	0	0	0	0	0	0	80	0	0	0	0	0	0	0	0	0	0	1	2	0	0	0	0	0	0	0	0	0	0	0	0	0	0	0	6	0	0	0	0	0	0	0	0
158814	South Pennines	51	control	658397	2013-05-01	46.98	0	0	0	0	0	0	169	0	0	0	0	0	0	0	0	0	0	0	0	0	0	0	0	0	0	0	0	0	0	0	0	1	0	0	3	0	0	0	0	0	0	0	0
152858	North East Peak District	53	control	658405	2013-05-02	22.22	0	0	0	0	0	0	2	0	0	0	0	0	0	0	0	0	0	0	0	0	0	0	0	0	0	0	0	0	0	0	0	0	0	0	0	0	0	0	0	0	0	0	1
68759	Yorkshire Dales	49	downstream	658720	2013-05-03	26.92	0	0	0	0	0	0	382	18	0	0	0	0	0	0	0	0	0	0	0	0	0	0	0	0	0	0	0	0	0	0	0	0	0	0	0	0	0	0	0	0	0	0	0
50378	South West Peak District	37	control	658756	2013-05-07	47.27	0	0	0	0	0	0	33	0	0	0	0	0	0	0	0	0	0	0	0	0	0	0	0	0	0	0	0	0	0	0	0	0	0	0	0	0	0	0	0	0	0	0	0
51715	South West Peak District	37	downstream	658805	2013-05-07	33.43	0	0	0	0	0	0	323	0	0	0	0	0	1	0	0	0	0	1	9	29	0	0	0	0	0	0	1	0	0	0	0	0	0	0	0	0	0	0	0	0	0	0	0
157547	South West Peak District	42	downstream	658825	2013-05-07	43.73	0	0	0	0	0	0	117	0	0	0	0	0	0	0	0	0	0	1	0	5	0	0	0	0	0	0	0	0	0	0	0	0	0	0	1	0	0	0	0	1	0	0	0
77580	South West Peak District	58	downstream	659015	2013-05-03	25.36	0	0	0	0	0	0	18	0	0	0	0	0	0	0	0	0	0	2	0	0	0	0	0	0	0	0	0	0	0	0	0	0	0	0	2	0	0	0	0	0	0	0	0
1153	Yorkshire Dales	60	control	659083	2013-05-08	23.62	0	0	0	0	0	0	91	5	0	0	0	0	0	0	0	0	0	0	0	0	0	0	0	0	0	0	0	0	0	0	0	0	0	0	35	0	0	0	0	0	0	0	1
63372	North England	45	control	659357	2013-05-07	5.75	0	0	0	0	0	0	24	0	0	0	0	0	0	0	0	0	0	0	0	0	0	10	0	0	0	0	0	0	0	0	0	0	0	0	0	0	0	0	0	0	0	0	0
50020	Midlands	39	control	659367	2013-05-09	53.92	0	0	0	0	0	0	90	0	0	0	0	0	0	0	0	0	0	11	0	0	0	0	0	0	0	0	1	0	0	0	0	1	0	1	7	0	0	0	0	0	0	0	0
52427	Midlands	41	downstream	659374	2013-05-09	65.24	0	0	0	0	0	0	28	0	0	0	0	0	0	0	0	0	0	79	0	0	0	0	0	0	0	0	0	0	0	0	0	0	0	0	12	0	0	0	0	3	0	0	0
74823	South Pennines	61	control	659399	2013-04-19	21.09	0	0	0	0	0	0	57	0	0	0	0	0	0	0	0	0	0	0	0	0	0	1	0	0	0	0	0	0	0	0	0	0	0	0	0	0	0	0	0	0	0	0	0
63855	North England	66	downstream	659408	2013-05-07	33.66	0	0	0	0	0	0	30	0	0	0	0	0	0	0	0	0	0	3	1	1	0	0	0	0	0	0	0	0	0	0	0	1	0	0	0	0	0	0	0	0	0	0	0
51073	Midlands	41	control	660103	2013-05-15	65.17	0	0	0	0	0	0	16	0	0	0	0	0	0	0	0	0	0	12	0	1	0	0	0	0	0	1	0	0	0	0	0	15	0	1	9	0	0	0	0	0	0	0	0
47592	Midlands	38	downstream	660112	2013-05-15	74.92	0	0	0	0	0	0	4	0	0	0	0	0	0	0	11	1	2	62	1	1	0	0	0	0	0	0	0	0	0	1	0	1	0	0	8	0	0	0	0	0	0	0	0
78696	North England	45	downstream	660380	2013-05-17	22.25	0	0	0	0	0	0	324	0	0	0	0	0	0	0	0	0	0	0	0	0	9	17	6	0	0	0	0	0	0	0	0	0	0	0	0	0	0	0	0	0	0	0	0
55714	Midlands	43	control	661101	2013-05-16	71.6	0	0	0	0	0	0	79	0	0	0	0	0	0	0	0	0	0	122	0	0	0	0	0	0	0	0	0	0	0	0	0	0	0	0	0	0	0	0	0	0	0	0	0
55583	Midlands	43	downstream	661103	2013-05-16	55.69	1	0	0	0	0	0	78	0	0	0	0	0	0	0	2	3	4	54	0	0	0	0	0	0	0	0	0	0	0	0	0	0	0	1	8	0	0	0	0	0	0	0	0
1576	Yorkshire Dales	60	downstream	661133	2013-05-21	13.36	0	0	0	0	0	0	86	0	0	0	0	0	0	0	0	0	0	0	0	6	0	0	0	0	0	0	0	0	0	0	0	0	0	0	0	0	0	0	0	0	0	0	0
1573	South Pennines	15	downstream	661134	2013-05-21	34.91	0	0	0	0	0	0	41	0	0	0	0	0	0	0	0	0	0	0	0	0	0	0	0	0	0	0	0	0	0	0	0	0	0	0	0	0	0	0	0	0	0	0	0
158753	South Pennines	15	control	661135	2013-05-21	31.04	0	0	0	0	0	0	96	0	0	0	0	0	0	0	0	0	0	0	0	0	0	7	0	0	0	0	0	0	0	0	0	0	0	0	0	0	0	0	0	0	0	0	0
1587	South Pennines	12	control	661137	2013-05-21	19.44	0	0	0	0	0	0	58	0	0	0	0	0	0	0	0	0	0	0	0	0	0	1	0	0	0	0	0	0	0	0	0	0	0	0	0	0	0	0	0	0	0	0	0
1169	South Pennines	12	downstream	661138	2013-05-21	12.04	0	0	0	0	0	0	46	0	0	0	0	0	0	0	0	0	0	0	0	0	0	0	0	0	0	0	0	0	0	0	0	0	0	0	0	0	0	0	0	0	0	0	0
418	North East Peak District	2	control	661141	2013-05-22	5.2	0	0	0	0	0	0	10	0	0	0	0	0	0	0	0	0	0	0	0	0	0	0	0	0	0	0	0	0	0	0	0	0	0	0	0	0	0	0	0	0	0	0	0
473	North East Peak District	10	control	661142	2013-05-22	18.39	0	0	0	0	0	0	65	0	0	0	0	0	0	0	0	0	0	0	0	0	0	0	0	0	2	0	0	0	0	0	0	1	0	0	0	0	0	0	0	0	0	0	0
148	North East Peak District	2	downstream	661145	2013-05-22	29.57	0	0	0	0	0	0	105	0	0	0	0	0	0	0	0	0	0	2	0	0	0	0	0	0	0	0	0	0	0	0	0	0	0	0	0	0	0	0	0	0	0	0	0
142369	North East Peak District	10	downstream	661151	2013-05-15	41.7	0	0	0	0	0	0	33	0	0	0	0	0	0	0	0	0	0	1	1	16	0	0	0	0	0	0	0	0	0	0	0	0	0	0	1	0	0	0	0	0	0	0	4
1240	North East Peak District	3	control	661152	2013-05-22	13.75	0	0	0	0	0	0	50	0	0	0	0	0	0	0	0	0	0	0	0	0	0	0	0	0	0	0	0	0	0	0	0	0	0	0	0	0	0	0	0	0	0	0	12
118	North East Peak District	1	downstream	661154	2013-05-22	28.49	0	0	0	0	0	0	108	0	0	0	0	0	0	0	0	0	0	0	0	0	0	0	0	0	0	0	0	0	0	0	0	0	0	0	0	0	0	0	0	0	0	0	1
158760	North East Peak District	1	control	661155	2013-05-22	1.97	0	0	0	0	0	0	8	0	0	0	0	0	0	0	0	0	0	0	0	0	0	0	0	0	0	0	0	0	0	0	0	0	0	0	0	0	0	0	0	0	0	0	1
1580	North East Peak District	16	downstream	661160	2013-05-22	33.42	0	0	0	0	0	0	48	0	0	0	0	0	0	0	0	0	0	0	0	2	0	1	0	0	3	0	0	0	0	0	0	0	0	0	0	0	0	0	0	2	0	0	1
50031	Midlands	40	control	668958	2013-09-03	76.16	0	0	0	0	0	0	8	0	0	0	0	0	0	0	0	1	4	66	0	0	0	0	0	0	0	0	0	0	0	1	0	0	0	5	13	0	0	0	0	0	1	0	0
159064	North England	47	control	670281	2013-05-07	24.62	0	0	0	0	0	0	310	0	0	0	0	0	0	0	0	0	0	0	0	0	0	25	0	0	0	0	0	0	0	0	0	0	0	0	0	0	0	0	0	0	0	0	0
67130	South West Peak District	54	downstream	670433	2013-09-09	49.91	0	0	0	0	0	0	102	0	0	0	0	0	0	0	0	0	0	29	0	2	0	0	0	0	0	0	0	0	1	2	0	0	0	0	35	0	0	0	0	0	0	0	0
1580	North East Peak District	16	downstream	670890	2013-09-02	22.33	0	0	0	0	0	0	133	0	0	0	0	0	0	0	0	0	0	0	0	1	0	5	0	0	0	0	0	0	0	0	0	0	0	0	0	0	0	0	0	0	0	0	4
142369	North East Peak District	10	downstream	670891	2013-09-05	35.09	0	0	0	0	0	0	157	0	0	0	0	0	0	0	0	0	0	5	3	28	0	0	0	0	0	0	0	0	0	0	0	5	0	0	3	0	0	0	0	0	0	0	5
22	Yorkshire Dales	65	control	670892	2013-09-11	25.9	0	0	0	0	0	0	291	1	0	0	0	0	0	0	0	0	0	0	0	0	0	0	0	0	0	0	0	0	0	0	0	0	0	0	6	0	0	0	0	0	0	0	0
148	North East Peak District	2	downstream	670895	2013-09-03	35.44	0	0	0	0	0	0	109	0	0	0	0	0	0	0	0	0	0	15	0	0	0	0	0	0	0	0	0	0	0	0	0	0	0	0	14	0	0	0	0	0	0	0	0
1169	South Pennines	12	downstream	670899	2013-09-11	9.76	0	0	0	0	0	0	107	0	0	0	0	0	0	0	0	0	0	0	0	1	0	4	0	0	0	0	0	0	0	0	0	0	0	0	0	0	0	0	0	0	0	0	0
254	South Pennines	61	downstream	670901	2013-09-11	37.41	0	0	0	0	0	0	75	0	0	0	0	0	0	0	0	0	0	2	5	0	0	0	0	0	0	0	0	0	0	0	0	0	0	0	29	0	0	0	0	0	0	0	2
74823	South Pennines	61	control	671007	2013-09-08	14.94	0	0	0	0	0	0	183	0	0	0	0	0	0	0	0	0	0	0	0	0	0	6	0	0	0	0	0	0	0	0	0	0	0	0	0	0	0	0	0	0	0	0	0
163464	Yorkshire Dales	65	downstream	671032	2013-09-10	40.79	0	0	0	0	0	0	53	21	0	0	0	0	0	0	0	0	0	5	0	0	0	0	0	0	1	0	0	0	0	0	0	0	0	0	0	0	0	0	0	0	0	0	3
69430	South Pennines	56	control	671166	2013-09-13	24.66	0	0	0	0	0	0	95	0	0	0	0	0	0	0	0	0	0	0	0	0	0	0	0	0	0	0	0	0	0	0	0	0	0	0	0	0	0	0	0	0	1	0	1
465	Yorkshire Dales	8	downstream	671260	2013-09-10	26.1	0	0	0	0	0	0	237	0	0	0	0	0	0	0	0	0	0	9	1	36	0	0	0	0	0	0	0	0	0	0	0	15	0	0	1	0	0	0	0	0	0	0	0
55714	Midlands	43	control	671646	2013-09-16	66.08	0	0	0	0	0	0	90	0	0	0	0	0	0	0	1	6	0	114	0	0	0	0	0	0	0	0	0	0	0	0	0	0	0	0	3	0	0	0	0	0	0	0	0
1759	North England	18	control	671711	2013-09-16	27.86	0	0	0	0	0	0	384	0	0	0	0	0	0	0	0	0	0	0	0	0	0	0	0	0	0	0	0	0	0	0	0	0	0	0	1	0	0	0	0	0	5	0	2
936	Yorkshire Dales	7	control	671956	2013-09-16	63.53	0	0	0	0	0	0	28	0	0	0	0	0	1	0	0	0	0	11	0	0	0	0	0	0	0	0	0	0	0	0	0	0	0	0	5	0	0	0	0	0	1	0	0
65118	Yorkshire Dales	49	control	672011	2013-09-19	18.57	0	0	0	0	0	0	412	0	0	0	0	0	0	0	0	0	0	0	0	0	0	0	0	0	4	0	0	0	0	0	0	0	0	0	0	0	0	0	0	0	0	0	0
1758	North England	18	downstream	672085	2013-09-19	35.38	0	0	0	0	1	0	196	2	0	0	0	0	0	0	0	0	0	4	2	25	0	0	0	0	0	0	0	0	0	0	0	3	0	0	20	0	0	0	0	0	0	0	2
1594	Yorkshire Dales	17	downstream	672646	2013-09-24	46.83	0	0	0	0	0	0	20	0	0	0	2	0	0	0	0	0	0	0	0	3	0	0	0	0	0	0	0	0	0	0	0	14	0	0	5	0	0	0	0	0	0	0	0
1576	Yorkshire Dales	60	downstream	672672	2013-09-19	14.05	0	0	0	0	0	0	126	0	0	0	0	0	0	0	0	0	0	1	1	0	0	0	0	0	0	0	0	0	0	0	0	2	0	0	0	0	0	0	0	0	0	0	0
1153	Yorkshire Dales	60	control	672685	2013-09-19	20.74	0	0	0	0	0	0	104	0	0	0	0	0	0	0	0	0	0	0	0	0	0	0	0	0	0	0	0	0	0	0	0	0	0	0	15	0	0	0	0	0	0	0	0
1587	South Pennines	12	control	673454	2013-09-29	16.79	0	0	0	0	0	0	67	0	0	0	0	0	0	0	0	0	0	0	0	0	0	1	0	0	0	0	0	0	0	0	0	0	0	0	0	0	0	0	0	0	0	0	0
1573	South Pennines	15	downstream	673588	2013-09-30	36.21	0	0	0	0	0	0	57	0	0	0	0	0	0	0	0	0	0	7	5	0	0	0	0	0	0	0	0	0	0	0	0	25	0	0	2	0	0	0	0	0	0	0	0
50020	Midlands	39	control	673930	2013-10-02	75.59	0	0	0	0	0	0	17	0	0	0	0	0	0	0	0	0	0	55	0	0	0	0	0	0	0	0	0	0	0	0	0	0	0	0	53	0	0	0	0	0	0	0	0
158753	South Pennines	15	control	674090	2013-09-17	12.01	0	0	0	0	0	0	143	0	0	0	0	0	0	0	0	0	0	1	0	0	0	0	0	0	0	0	0	0	0	0	0	0	0	0	1	0	0	0	0	0	0	0	0
152682	Yorkshire Dales	7	downstream	674092	2013-09-16	52.75	0	0	0	0	0	0	97	0	0	0	0	0	1	0	0	0	0	48	0	0	0	0	0	0	0	0	0	0	0	0	0	0	0	1	6	0	0	0	0	0	0	0	0
158814	South Pennines	51	control	674506	2013-10-07	50.14	0	0	0	0	0	0	48	0	0	0	0	0	0	0	0	0	0	1	0	0	0	0	0	0	0	0	0	0	0	0	0	0	0	3	23	0	0	0	0	0	0	0	3
46924	South West Peak District	36	downstream	674510	2013-10-07	30.07	0	0	0	0	0	0	68	10	0	0	0	0	7	0	0	0	0	2	1	0	0	0	0	0	0	0	0	0	0	0	0	0	0	0	0	0	0	0	0	0	0	0	2
52427	Midlands	41	downstream	674574	2013-10-08	64.39	0	0	0	0	0	0	16	0	0	0	0	0	0	0	0	0	0	27	0	0	0	0	0	0	0	0	0	0	0	0	0	0	0	6	117	0	0	0	0	0	0	0	0
118	North East Peak District	1	downstream	674586	2013-10-04	27.95	0	0	0	0	0	0	99	0	0	0	0	0	0	0	0	0	0	0	1	0	0	0	0	0	0	0	0	0	0	0	0	0	0	0	0	0	0	0	0	0	0	0	3
63855	North England	66	downstream	674856	2013-10-09	58.31	0	0	0	0	0	0	41	1	0	0	0	1	0	0	0	0	0	11	0	0	0	0	0	0	0	0	0	0	0	0	0	0	0	0	160	0	0	0	0	1	0	0	0
473	North East Peak District	10	control	674914	2013-10-08	8.63	0	0	0	0	0	0	10	0	0	0	0	0	0	0	0	0	0	0	0	1	0	0	0	0	0	0	0	0	0	0	0	0	0	0	1	0	0	0	0	0	0	0	0
68458	South Pennines	56	downstream	675106	2013-10-10	45.72	0	0	0	0	0	0	24	0	0	0	0	0	4	0	0	0	0	4	24	164	0	0	0	0	0	0	0	0	3	0	0	0	0	0	1	0	0	1	0	0	0	0	0
63372	North England	45	control	675467	2013-10-11	9.29	0	0	0	0	0	0	84	0	0	0	0	0	0	0	0	0	0	0	0	0	2	13	0	0	5	0	0	0	0	0	0	0	0	0	0	0	0	0	0	0	0	0	0
418	North East Peak District	2	control	675528	2013-09-12	6.29	0	0	0	0	0	0	38	0	0	0	0	0	0	0	0	0	0	1	0	0	0	0	0	0	0	0	0	0	0	0	0	1	0	0	0	0	0	0	0	0	0	0	0
51073	Midlands	41	control	675632	2013-10-11	66.67	0	0	0	0	0	0	39	0	0	0	0	0	0	0	0	0	0	9	0	0	0	0	0	0	0	0	0	0	0	0	0	0	0	21	10	0	0	0	0	0	0	0	0
51065	Midlands	38	control	675633	2013-10-11	75.33	0	0	0	0	0	0	19	0	0	0	0	0	0	0	0	3	1	107	0	0	0	0	0	0	0	0	2	0	0	0	0	0	0	1	11	0	0	0	0	0	0	0	0
50378	South West Peak District	37	control	675890	2013-10-15	60.42	0	0	0	0	0	0	38	0	0	0	0	0	1	0	0	0	0	20	0	0	0	0	0	0	0	0	0	0	0	0	0	0	0	0	5	0	0	0	0	1	0	0	0
52186	South West Peak District	42	control	675895	2013-10-15	49.2	0	0	0	0	0	0	99	0	0	0	0	0	0	0	0	0	0	0	0	0	0	0	0	0	0	0	0	0	0	0	0	0	0	0	2	0	0	0	0	0	0	0	0
67595	North East Peak District	53	downstream	675984	2013-10-11	19.14	0	0	0	0	0	0	19	0	0	0	0	0	0	0	0	0	0	3	0	2	0	0	0	0	0	0	0	0	0	0	0	0	0	0	2	0	0	0	0	1	1	0	1
159064	North England	47	control	676078	2013-10-15	15.67	0	0	0	0	0	0	188	0	0	0	0	0	0	0	0	0	0	0	0	0	0	0	0	0	7	0	0	0	0	0	0	0	0	0	0	0	0	0	0	0	0	0	0
158760	North East Peak District	1	control	676372	2013-10-16	8.78	0	0	0	0	0	0	1	0	0	0	0	0	0	0	0	0	0	0	0	0	0	0	0	0	0	0	0	0	0	0	0	0	0	0	0	0	0	0	0	0	0	0	0
68759	Yorkshire Dales	49	downstream	676449	2013-10-17	46.75	0	0	0	0	0	0	122	0	0	0	0	0	0	1	0	0	0	7	1	2	0	0	0	0	0	0	0	0	0	0	0	2	0	0	4	0	0	0	0	0	0	0	0
77580	South West Peak District	58	downstream	676588	2013-10-18	21.78	0	0	0	0	0	0	61	0	0	0	0	0	3	0	0	0	0	0	1	0	0	0	0	0	2	0	0	0	0	0	0	0	0	0	23	0	0	0	0	0	0	0	5
152858	North East Peak District	53	control	676590	2013-10-18	8.97	0	0	0	0	0	0	82	0	0	0	0	0	0	0	0	0	0	0	0	0	0	0	0	0	0	0	0	0	0	0	0	0	0	0	0	0	0	0	0	0	0	0	0
69134	South Pennines	51	downstream	677162	2013-10-23	57.9	0	0	0	0	0	0	69	1	0	0	0	0	1	0	0	0	0	13	0	0	0	0	0	0	0	0	0	0	0	0	0	0	0	0	0	0	0	0	0	3	0	0	0
1240	North East Peak District	3	control	677727	2013-10-24	14.36	0	0	0	0	0	0	148	0	0	0	0	0	0	0	0	0	0	0	0	0	0	10	0	0	0	0	0	0	0	0	0	0	0	0	0	0	0	0	0	0	0	0	8
51715	South West Peak District	37	downstream	677949	2013-10-29	65.45	0	0	0	0	0	0	55	0	0	0	0	0	0	0	0	0	0	63	1	28	0	0	0	0	0	0	4	0	0	0	0	0	0	0	10	0	0	0	0	1	0	0	0
1584	North East Peak District	13	downstream	678535	2013-11-04	45.24	0	0	0	0	0	0	72	0	0	0	0	0	0	0	0	0	0	2	0	3	0	0	0	0	0	0	0	0	0	0	0	0	0	0	1	0	0	0	0	0	0	0	0
75896	North East Peak District	13	control	678541	2013-11-04	15.75	0	0	0	0	0	0	197	0	0	0	0	0	0	0	0	0	0	0	0	0	0	0	0	0	0	0	0	0	0	0	0	0	0	0	0	0	0	0	0	0	0	0	0
97161	South West Peak District	36	control	678834	2013-11-07	20.34	0	0	0	0	0	0	109	0	0	0	0	0	0	0	0	0	0	0	0	0	0	0	0	0	0	0	0	0	0	0	0	0	0	0	0	0	0	0	0	0	0	0	0
64262	North England	47	downstream	680259	2013-11-14	38.65	0	0	0	0	0	0	98	7	0	0	0	0	0	0	0	0	0	4	0	0	0	0	0	0	0	0	0	1	0	0	0	0	0	0	43	0	0	0	0	0	0	0	0
158815	South West Peak District	58	control	680686	2013-11-19	23.87	0	0	0	0	0	0	925	0	0	0	0	0	0	0	0	0	0	0	0	0	0	0	0	0	0	0	0	0	0	0	0	0	0	0	0	0	0	0	0	0	0	0	4
55583	Midlands	43	downstream	680910	2013-11-15	79.82	0	0	0	0	0	0	5	0	0	0	0	0	0	0	17	30	2	127	0	0	0	0	0	0	0	0	0	0	0	0	0	0	0	1	6	0	0	0	0	0	0	0	0
78696	North England	45	downstream	681621	2013-11-27	19.94	0	0	0	0	0	28	253	0	0	0	0	0	0	0	0	0	0	0	0	0	5	57	0	0	6	0	0	0	0	0	0	0	0	0	0	0	0	0	0	0	0	0	0
152682	Yorkshire Dales	7	downstream	689096	2014-04-03	45.46	0	0	0	0	0	0	39	60	0	0	0	0	0	0	0	0	0	10	0	0	0	0	0	0	0	0	0	0	0	0	0	0	0	0	7	0	0	0	0	0	0	0	0
465	Yorkshire Dales	8	downstream	689274	2014-04-02	24.17	0	0	0	0	0	0	525	0	0	0	0	0	0	0	0	0	0	0	0	0	0	0	0	0	0	0	0	0	0	0	0	0	0	0	1	0	0	0	0	0	0	0	0
55714	Midlands	43	control	689345	2014-04-07	56.83	0	0	0	0	0	0	108	0	0	0	0	0	0	0	0	0	0	42	0	0	0	0	0	0	0	0	0	0	0	0	0	0	0	2	3	0	0	0	0	0	0	0	0
55583	Midlands	43	downstream	689347	2014-04-07	62.86	0	0	0	0	0	0	86	0	0	0	0	0	0	0	5	0	0	73	0	0	0	0	0	0	0	0	0	0	0	0	0	5	0	0	19	0	0	0	0	0	0	0	0
159064	North England	47	control	689543	2014-04-04	11.69	0	0	0	0	0	0	105	0	0	0	0	0	0	0	0	0	0	0	0	0	7	0	0	0	12	0	0	0	0	0	0	0	0	0	0	0	0	0	0	0	0	0	0
64262	North England	47	downstream	689547	2014-04-04	16.67	0	0	0	0	0	0	58	0	0	0	0	0	0	0	0	0	0	0	0	0	0	0	0	0	0	0	0	0	0	0	0	0	0	0	0	0	0	0	0	0	0	0	0
65118	Yorkshire Dales	49	control	689762	2014-04-09	3.13	0	0	0	0	0	0	32	0	0	0	0	0	0	0	0	0	0	0	0	0	0	0	0	0	0	0	0	0	0	0	0	0	0	0	0	0	0	0	0	0	0	0	0
51392	Midlands	40	downstream	689960	2014-04-11	67.81	0	0	0	0	0	0	41	0	0	0	0	0	0	0	0	0	0	51	0	25	0	0	0	0	0	0	0	0	0	0	0	0	0	2	53	0	0	0	0	0	16	0	0
1240	North East Peak District	3	control	690166	2014-04-14	18.46	0	0	0	0	0	13	94	0	0	0	0	0	0	0	0	0	0	0	0	0	0	0	0	0	0	0	0	0	0	0	0	0	0	0	0	0	0	0	0	0	0	0	24
67595	North East Peak District	53	downstream	690205	2014-04-10	53.68	0	0	0	0	0	0	50	0	0	0	0	0	0	0	0	0	0	0	0	1	0	0	0	0	0	0	0	0	0	0	0	0	0	0	0	0	0	0	0	0	0	0	15
67130	South West Peak District	54	downstream	690226	2014-04-11	51.24	0	0	0	0	0	0	23	0	0	0	0	0	0	0	0	0	0	25	26	6	0	0	0	0	0	0	0	0	0	0	0	0	0	1	21	0	0	0	0	0	0	0	1
63855	North England	66	downstream	690274	2014-04-15	22.23	0	0	0	0	0	0	85	0	0	0	0	0	0	0	0	0	0	0	0	0	0	0	0	0	0	0	0	0	0	0	0	0	0	0	1	0	0	0	0	0	0	0	0
1573	South Pennines	15	downstream	690495	2014-04-09	44.42	0	0	0	0	0	0	38	0	0	0	0	0	0	0	0	0	0	0	19	0	0	0	0	0	0	0	0	0	0	0	0	0	0	0	7	0	0	0	0	0	0	0	0
473	North East Peak District	10	control	690502	2014-04-15	30.52	0	0	0	0	0	4	36	1	0	0	0	0	0	0	0	0	0	3	0	0	0	0	0	0	0	0	0	0	0	0	0	0	0	0	0	0	0	0	0	0	0	0	0
1594	Yorkshire Dales	17	downstream	690506	2014-04-11	31.94	0	0	0	0	0	0	92	0	0	0	0	0	0	0	0	1	0	7	0	0	0	0	0	0	0	0	0	0	0	0	0	0	0	0	1	0	0	0	0	0	0	0	3
142369	North East Peak District	10	downstream	690507	2014-04-15	45.73	0	0	0	0	0	0	89	0	0	0	0	0	0	0	0	0	0	2	5	15	0	0	0	0	0	0	0	0	0	0	0	0	0	0	3	0	0	0	0	0	0	0	0
69430	South Pennines	56	control	690814	2014-04-17	29.76	0	0	0	0	0	0	54	0	0	0	0	0	0	0	0	0	0	2	0	0	0	0	0	0	0	0	0	0	0	0	0	0	0	0	1	0	0	0	0	0	0	0	0
254	South Pennines	61	downstream	690885	2014-04-17	33.73	0	0	0	0	0	0	320	0	0	0	0	0	0	0	0	0	0	18	0	10	0	0	0	0	0	0	0	0	0	0	0	0	0	0	8	0	0	0	0	0	0	0	0
158753	South Pennines	15	control	690904	2014-04-17	10.86	0	0	0	0	0	0	73	0	0	0	0	0	0	0	0	0	0	0	0	0	0	0	0	0	0	0	0	0	0	0	0	0	0	0	0	0	0	0	0	0	0	0	1
418	North East Peak District	2	control	690920	2014-04-17	31.03	0	0	0	0	0	0	26	0	0	0	0	0	0	0	0	0	0	4	0	0	0	0	0	0	0	0	0	0	0	0	0	0	0	0	1	0	0	0	0	0	0	0	0
148	North East Peak District	2	downstream	690922	2014-04-17	40.66	0	0	0	0	0	0	70	0	0	0	0	0	0	0	0	0	0	8	0	0	0	0	0	0	0	0	0	0	0	0	0	0	0	0	20	0	4	0	0	0	0	0	1
74823	South Pennines	61	control	690980	2014-04-17	26.84	0	0	0	0	0	0	5	0	0	0	0	0	0	0	0	0	0	0	0	0	0	5	0	0	0	0	0	0	0	0	0	0	0	0	0	0	0	0	0	0	0	0	0
52427	Midlands	41	downstream	691632	2014-04-25	68.61	0	0	0	0	0	0	46	0	0	0	0	0	0	0	0	3	0	65	0	0	0	0	0	0	0	0	0	0	0	0	0	4	0	0	6	0	0	0	0	1	0	0	0
47592	Midlands	38	downstream	691633	2014-04-25	55.15	0	0	0	0	0	0	84	0	0	0	0	0	0	0	0	0	0	24	0	0	0	0	0	0	0	0	0	0	0	0	0	1	0	1	2	0	0	0	0	0	0	0	0
68759	Yorkshire Dales	49	downstream	691683	2014-04-15	47.08	0	0	0	0	0	0	72	0	0	0	0	0	0	0	0	0	0	0	0	0	0	0	0	0	0	0	0	0	0	0	0	0	0	0	2	0	0	0	0	0	0	0	1
1759	North England	18	control	691895	2014-04-29	22.58	0	0	0	0	0	0	159	0	0	0	0	0	0	0	0	0	0	2	0	0	0	0	0	0	0	0	0	0	0	0	0	0	0	0	0	0	0	0	0	0	0	0	1
1758	North England	18	downstream	691897	2014-04-29	26.36	0	0	0	0	0	0	152	5	0	0	0	0	0	0	0	0	0	0	0	40	0	0	0	0	0	0	0	0	0	0	0	0	0	0	0	0	0	0	0	0	0	0	3
1153	Yorkshire Dales	60	control	692096	2014-04-30	18.01	0	0	0	0	0	0	65	0	0	0	0	0	0	0	0	0	0	0	0	0	0	0	0	0	0	0	0	0	0	0	0	0	0	0	34	0	0	0	0	0	0	0	3
1584	North East Peak District	13	downstream	692173	2014-04-16	31.09	0	0	0	0	0	0	113	0	0	0	0	0	0	0	0	0	0	5	1	0	0	0	0	0	0	0	0	0	0	0	0	0	0	0	0	0	0	0	0	1	0	0	0
69134	South Pennines	51	downstream	692182	2014-04-15	61.97	0	0	0	0	0	0	10	0	0	0	0	0	0	0	0	0	0	28	1	0	0	0	0	0	0	0	1	0	0	0	0	0	0	0	95	0	0	0	0	0	0	0	3
75896	North East Peak District	13	control	692183	2014-04-16	25.36	0	0	0	0	0	0	294	0	0	0	0	0	0	0	0	0	0	0	0	0	0	0	0	0	1	0	0	0	0	0	0	0	0	0	0	0	0	0	0	0	0	0	0
158815	South West Peak District	58	control	692252	2014-04-29	29.63	0	0	0	0	0	0	118	0	0	0	0	0	0	0	0	0	0	0	0	0	0	0	0	0	0	0	0	0	0	0	0	0	0	0	0	0	0	0	0	0	0	0	45
158814	South Pennines	51	control	692253	2014-04-29	36.44	0	0	0	0	0	0	179	0	0	0	0	0	0	0	0	0	0	0	0	0	0	0	0	0	0	0	0	0	0	0	0	0	0	0	0	0	0	0	0	0	0	0	0
118	North East Peak District	1	downstream	692432	2014-05-06	19.37	0	0	0	0	0	11	200	0	5	0	0	0	0	0	0	0	0	1	0	0	0	0	0	0	3	0	0	0	0	0	0	0	0	0	0	0	0	0	0	0	0	0	0
158760	North East Peak District	1	control	692440	2014-05-06	15.6	0	0	0	0	0	0	4	0	0	0	0	0	0	0	0	0	0	0	0	0	0	0	0	0	1	0	0	0	0	0	0	0	0	0	0	0	0	0	0	0	0	0	0
51073	Midlands	41	control	692537	2014-05-06	56.17	0	0	0	0	0	0	108	0	0	0	0	0	0	0	0	0	0	5	0	0	0	0	0	0	0	0	0	0	0	0	0	0	0	0	2	0	0	0	0	0	1	0	0
52186	South West Peak District	42	control	692610	2014-05-07	43.52	0	0	0	0	0	0	156	0	0	0	0	0	0	0	0	0	0	12	0	0	0	0	0	0	0	0	0	0	0	0	0	0	0	0	7	0	0	0	0	0	0	0	0
50378	South West Peak District	37	control	692667	2014-05-07	39.23	0	0	0	0	0	0	135	0	0	0	0	0	0	0	0	0	0	0	1	0	0	0	0	0	0	0	0	0	0	0	0	0	0	0	1	0	0	0	0	0	0	0	1
51715	South West Peak District	37	downstream	692670	2014-05-07	52.39	0	0	0	0	0	0	55	0	0	0	0	0	0	0	0	0	0	4	7	6	0	0	0	0	0	0	0	0	0	0	0	0	0	0	0	0	0	0	0	0	0	0	0
50031	Midlands	40	control	692677	2014-05-07	74.56	0	0	0	0	0	0	13	0	0	0	0	0	0	0	0	0	0	53	0	0	0	0	0	0	0	0	0	0	0	0	0	0	3	0	12	0	0	0	0	0	4	0	0
1580	North East Peak District	16	downstream	692733	2014-05-09	54.97	0	0	0	0	0	0	27	0	0	0	0	0	0	0	0	0	0	0	1	0	0	0	0	0	0	0	0	0	0	0	0	0	0	0	1	0	0	0	0	0	0	0	0
68458	South Pennines	56	downstream	693394	2014-04-30	48.56	0	0	0	0	0	0	16	0	0	0	0	0	0	0	1	0	0	6	0	0	0	0	0	0	0	0	19	0	0	0	0	6	0	0	0	0	0	0	0	0	0	0	2
78696	North England	45	downstream	693396	2014-04-30	8.97	0	0	0	0	57	0	38	0	0	0	0	0	0	0	0	0	0	0	0	0	21	7	4	0	63	0	0	0	0	0	0	0	0	0	0	0	0	0	0	0	0	0	0
46924	South West Peak District	36	downstream	693441	2014-05-22	32.27	0	0	0	0	0	0	141	0	0	0	0	0	0	0	0	10	0	25	0	0	0	0	0	0	0	0	0	0	0	0	0	0	0	0	0	0	0	0	0	0	0	0	0
1169	South Pennines	12	downstream	693464	2014-05-22	13.88	0	0	0	0	0	2	100	1	0	0	0	0	0	0	0	0	0	0	0	0	0	0	0	0	3	0	0	0	0	0	0	0	0	0	0	0	0	0	0	0	0	0	0
1576	Yorkshire Dales	60	downstream	693467	2014-05-22	9.67	0	0	0	0	0	0	49	0	0	0	0	0	0	0	0	0	0	0	0	0	0	0	0	0	1	0	0	0	0	0	0	0	0	0	0	0	0	0	0	0	0	0	9
1587	South Pennines	12	control	693491	2014-05-20	5.94	0	0	0	0	0	0	33	0	0	0	0	0	0	0	0	0	0	0	0	0	0	0	0	0	1	0	0	0	0	0	0	0	0	0	0	0	0	0	0	0	0	0	0
63372	North England	45	control	693518	2014-05-23	29.32	0	0	0	0	0	0	165	0	0	0	0	0	0	0	0	0	0	6	0	0	0	0	0	0	6	0	0	0	0	0	0	0	0	0	5	0	0	0	0	0	0	0	0
158753	South Pennines	15	control	698905	2014-09-03	1.78	0	0	0	0	0	0	68	0	0	0	0	0	0	0	0	0	0	1	0	0	0	0	0	0	0	0	0	0	0	0	0	0	0	0	0	0	0	0	0	0	0	0	3
69430	South Pennines	56	control	698907	2014-09-04	25.08	0	0	0	0	0	0	67	0	0	0	0	0	0	0	1	0	0	0	0	0	0	0	0	0	0	0	0	0	0	0	0	0	0	0	1	0	0	0	0	0	0	0	5
152682	Yorkshire Dales	7	downstream	699160	2014-09-05	56.97	0	0	0	0	0	0	94	10	0	0	0	0	0	0	0	0	0	8	0	0	0	0	0	0	0	0	0	0	0	0	0	0	0	17	9	0	0	0	0	0	0	0	3
465	Yorkshire Dales	8	downstream	699252	2014-09-05	11.51	0	0	0	0	0	0	110	0	0	0	0	0	0	0	0	0	0	0	0	3	0	0	0	0	0	0	0	0	0	0	0	19	0	0	0	0	0	0	0	0	0	0	0
254	South Pennines	61	downstream	699310	2014-09-09	38.42	0	0	0	0	0	7	90	0	0	0	0	0	0	0	0	0	0	40	0	0	0	0	0	0	0	0	1	0	0	0	0	0	0	0	48	0	0	0	0	0	0	0	0
1153	Yorkshire Dales	60	control	699334	2014-09-08	11.75	0	0	0	0	0	0	16	0	0	0	0	0	0	0	0	0	0	0	0	0	0	0	0	0	0	0	0	0	0	0	0	0	0	0	219	0	0	0	0	0	0	0	0
1576	Yorkshire Dales	60	downstream	699411	2014-09-08	14.96	0	0	0	0	0	0	33	1	0	0	0	0	0	0	0	0	0	0	0	0	0	0	0	0	0	0	0	0	0	0	0	0	0	0	4	0	0	0	0	0	0	0	6
1587	South Pennines	12	control	699575	2014-09-10	21.96	0	0	0	0	0	0	37	0	0	0	0	0	1	0	0	0	0	4	0	0	0	0	0	0	0	0	0	0	0	0	0	0	0	0	4	0	0	0	0	0	0	0	0
1169	South Pennines	12	downstream	699618	2014-09-10	14.14	0	0	0	0	0	0	55	0	0	0	0	0	0	0	0	0	0	3	0	0	0	0	0	0	2	0	0	0	0	0	0	0	0	1	1	0	0	0	0	0	2	0	0
1580	North East Peak District	16	downstream	699636	2014-09-10	45.14	0	0	0	0	0	0	34	0	0	0	0	0	0	0	0	0	0	1	1	0	0	0	0	0	0	0	0	0	0	0	0	2	0	0	17	0	0	0	0	0	0	0	7
68458	South Pennines	56	downstream	699693	2014-09-10	41.22	0	0	0	0	0	0	113	0	0	0	0	0	0	0	0	0	0	10	0	20	0	0	0	0	0	0	2	0	0	0	0	0	0	0	3	0	0	0	0	0	0	0	4
1758	North England	18	downstream	699714	2014-09-10	38.62	0	0	0	0	0	5	96	1	0	0	0	0	0	1	0	0	0	5	15	0	0	0	0	0	0	0	0	0	0	0	0	0	0	0	61	0	0	0	0	0	0	0	2
1573	South Pennines	15	downstream	699826	2014-09-11	33.68	0	0	0	0	0	5	57	0	0	0	0	0	0	0	0	1	0	8	1	0	0	0	0	0	0	0	0	0	0	0	0	0	0	0	7	0	0	0	0	0	2	0	0
64262	North England	47	downstream	700003	2014-09-12	16.98	0	0	0	0	0	0	106	0	0	0	0	0	0	0	0	0	0	0	0	0	0	0	0	0	0	0	0	0	0	0	0	0	0	0	22	0	0	0	0	0	0	0	0
142369	North East Peak District	10	downstream	700008	2014-09-12	48.35	0	0	0	0	0	0	35	0	0	0	0	0	0	0	0	0	0	0	13	0	0	0	0	0	2	0	0	0	0	0	0	0	0	0	7	0	0	0	0	0	1	0	0
473	North East Peak District	10	control	700026	2014-09-12	5.12	0	0	0	0	0	0	21	0	0	0	0	0	0	0	0	0	0	0	0	0	0	0	0	0	1	0	0	0	0	0	0	0	0	0	0	0	0	0	0	0	0	0	0
50378	South West Peak District	37	control	700223	2014-09-04	60.42	0	0	0	0	0	0	35	0	0	0	0	0	2	0	0	0	0	14	0	0	0	0	0	0	0	0	0	0	0	0	0	44	0	11	88	0	0	0	0	0	0	0	0
51715	South West Peak District	37	downstream	700226	2014-09-04	56.43	0	0	0	0	0	0	36	0	0	11	0	0	1	2	0	0	0	22	34	161	0	0	0	0	0	0	0	0	0	0	0	5	0	3	20	0	0	0	0	0	0	0	0
158760	North East Peak District	1	control	700493	2014-09-17	19.73	0	0	0	0	0	0	0	0	0	0	0	0	0	0	0	0	0	1	0	0	0	0	0	0	24	0	0	0	0	0	0	0	0	0	3	0	0	0	0	0	0	0	0
148	North East Peak District	2	downstream	700551	2014-09-17	44.44	0	0	0	0	0	0	48	2	0	0	0	0	0	0	0	0	0	10	0	0	0	0	0	0	0	0	0	0	0	0	0	0	0	0	206	0	0	0	0	0	0	0	0
52427	Midlands	41	downstream	700718	2014-09-18	70.24	0	0	0	0	0	0	5	0	0	0	0	0	0	0	0	0	0	120	0	6	0	0	0	0	0	0	0	0	0	0	0	0	0	1	143	0	0	0	0	0	0	0	0
75896	North East Peak District	13	control	700945	2014-09-18	12.18	0	0	0	0	0	0	149	1	0	0	0	0	0	0	0	0	0	0	0	0	0	0	0	0	0	0	0	0	0	0	0	0	0	0	0	0	0	0	0	0	0	0	1
1584	North East Peak District	13	downstream	700946	2014-09-18	42.51	0	0	0	1	0	0	56	0	0	0	0	0	0	0	0	0	0	0	3	0	0	0	0	0	0	0	0	0	0	0	0	0	0	0	65	0	0	0	0	0	0	0	1
1240	North East Peak District	3	control	700960	2014-09-19	14.88	0	0	0	0	0	0	86	0	1	0	0	0	0	0	0	0	0	0	0	0	0	0	0	0	0	0	0	0	0	0	0	0	0	0	1	0	0	0	0	0	0	0	12
74823	South Pennines	61	control	700965	2014-09-19	13.54	0	0	0	0	0	9	140	0	0	0	0	0	0	0	0	0	0	0	0	0	0	4	0	0	0	0	0	0	0	0	0	0	0	0	0	0	0	0	0	0	0	0	0
50031	Midlands	40	control	701251	2014-09-23	67.74	0	0	0	0	0	0	6	0	0	0	0	0	0	0	0	0	2	10	0	0	0	0	0	0	0	0	0	0	0	0	0	2	0	11	21	0	0	0	0	0	2	0	0
52186	South West Peak District	42	control	701467	2014-09-24	53.58	0	0	0	0	0	0	88	0	0	0	0	0	0	0	0	0	0	9	0	3	0	0	0	0	0	0	0	0	0	0	0	0	0	8	25	0	0	0	0	0	4	0	0
418	North East Peak District	2	control	701498	2014-09-25	1.04	0	0	0	0	0	0	6	0	0	0	0	0	0	0	0	0	0	0	0	0	0	0	0	0	0	0	0	0	0	0	0	0	0	0	2	0	0	0	0	0	0	0	0
65118	Yorkshire Dales	49	control	701520	2014-09-23	12.62	0	0	0	0	0	0	122	0	0	0	0	0	0	0	0	0	0	0	0	0	3	0	0	0	0	0	0	0	0	0	0	0	0	0	3	0	0	0	0	0	0	0	0
47592	Midlands	38	downstream	701578	2014-09-23	71.2	0	0	0	0	0	0	0	3	0	0	0	0	0	0	2	0	0	118	0	0	0	0	0	0	0	0	0	0	0	0	0	0	0	1	32	0	0	0	0	0	0	0	0
51392	Midlands	40	downstream	701695	2014-09-23	81.65	0	0	0	0	0	0	9	0	0	0	0	0	0	0	0	2	0	92	0	5	0	0	0	0	0	0	0	0	0	0	0	0	0	32	29	0	0	0	0	0	6	0	0
1594	Yorkshire Dales	17	downstream	701763	2014-09-25	35.02	0	0	0	0	0	0	38	0	0	0	0	0	0	0	1	0	0	4	0	0	0	0	0	0	0	0	0	0	0	0	0	0	0	0	30	0	0	0	0	0	0	0	0
1759	North England	18	control	701844	2014-09-23	62.99	0	0	0	0	0	0	48	0	0	0	0	0	0	0	0	0	0	0	0	0	0	0	0	0	0	0	0	0	0	0	0	0	0	0	0	0	0	0	0	0	0	0	1
159064	North England	47	control	702156	2014-09-30	22.44	0	0	0	0	75	0	185	0	0	0	0	0	0	0	0	0	0	0	0	0	1	0	0	0	7	0	0	0	0	0	0	0	0	0	0	0	0	0	0	0	0	0	0
118	North East Peak District	1	downstream	702214	2014-09-29	24.83	0	0	0	0	0	5	57	0	0	0	0	0	0	0	0	0	0	0	2	0	0	0	0	0	1	0	0	0	0	0	0	0	0	0	0	0	0	0	0	0	0	0	6
46924	South West Peak District	36	downstream	702917	2014-10-08	21.49	0	0	0	0	0	0	114	0	3	0	0	0	0	0	0	0	0	4	0	0	0	0	0	0	0	0	0	0	0	0	0	0	0	0	2	0	0	0	0	0	0	0	7
63855	North England	66	downstream	702932	2014-10-08	35.77	0	0	0	0	0	0	53	0	0	0	0	0	0	0	0	0	0	1	0	0	0	0	0	0	2	0	0	0	0	0	0	0	0	0	7	0	0	0	0	0	0	0	0
67130	South West Peak District	54	downstream	703051	2014-10-09	42.37	0	0	0	0	0	0	75	0	0	0	0	0	0	0	0	0	0	0	50	7	0	0	0	0	0	0	0	0	0	0	0	0	0	5	36	0	0	0	0	0	0	0	0
69134	South Pennines	51	downstream	703469	2014-10-15	60.13	0	0	0	0	0	0	32	0	0	0	0	0	0	0	0	0	0	55	0	0	0	0	0	0	0	0	0	0	0	0	0	0	0	0	17	0	0	0	0	0	0	0	0
68759	Yorkshire Dales	49	downstream	703478	2014-10-14	37.11	0	0	1	0	0	0	210	0	0	0	0	0	0	0	0	0	0	1	5	0	0	0	0	0	0	0	0	0	0	0	0	0	0	0	12	0	1	0	0	0	0	0	0
67595	North East Peak District	53	downstream	703684	2014-10-20	27.41	0	1	0	0	0	0	32	0	0	0	0	0	0	0	0	0	0	0	1	7	0	0	0	0	0	0	0	0	0	0	0	0	0	0	6	0	0	0	0	0	0	0	22
77580	South West Peak District	58	downstream	704284	2014-10-22	21.8	0	0	0	0	0	0	93	0	0	0	0	0	0	0	1	0	0	1	1	6	0	0	0	0	0	0	0	0	0	0	0	0	0	0	13	0	0	0	0	0	0	0	3
51073	Midlands	41	control	704295	2014-10-20	78.72	0	0	0	0	0	0	15	1	0	0	0	0	0	0	0	0	0	100	0	0	0	0	0	0	0	0	0	0	0	0	0	2	0	15	33	0	0	0	0	0	0	0	0
158814	South Pennines	51	control	704354	2014-10-23	54.4	0	0	0	0	0	0	41	0	0	0	0	0	0	0	0	0	0	6	0	0	0	0	0	0	0	0	0	0	0	0	0	0	0	0	46	0	0	0	0	0	0	0	0
158815	South West Peak District	58	control	704491	2014-10-24	38.45	0	0	0	0	0	0	96	0	0	0	0	0	0	0	0	0	0	0	2	0	0	0	0	0	0	0	1	0	0	0	0	0	0	0	0	0	0	0	0	0	0	0	2
50020	Midlands	39	control	704520	2014-10-24	84.88	0	0	0	0	0	0	8	0	0	0	0	0	0	0	3	0	0	146	0	0	0	0	0	0	0	0	0	0	0	0	0	0	0	0	23	0	0	0	0	0	0	0	0
55583	Midlands	43	downstream	704607	2014-10-28	61.84	0	0	0	0	0	0	56	0	0	0	0	0	0	0	2	0	0	72	0	0	0	0	0	0	0	0	2	0	0	0	0	10	0	1	12	1	0	0	0	0	0	0	1
55714	Midlands	43	control	704643	2014-10-29	73.16	0	0	0	0	0	0	30	0	0	0	0	0	0	0	0	0	0	55	0	0	0	0	0	0	0	0	2	0	0	0	0	0	0	11	36	0	0	0	0	0	0	0	0
157547	South West Peak District	42	downstream	705629	2014-11-12	69.17	0	0	0	0	0	0	26	0	0	0	0	0	0	0	0	0	0	10	7	600	0	0	0	0	0	0	2	0	0	0	0	0	0	2	0	0	0	0	0	0	3	0	0
51065	Midlands	38	control	705634	2014-11-12	71.07	0	0	0	0	0	0	12	2	0	0	0	0	0	0	4	1	0	22	0	0	0	0	0	0	0	0	3	0	0	0	0	0	0	10	11	0	0	0	0	0	0	0	2
78696	North England	45	downstream	705942	2014-11-20	5.85	0	0	0	0	48	0	24	0	0	0	0	0	0	0	0	0	0	0	0	0	8	6	12	0	71	0	0	0	0	0	0	0	0	0	0	0	0	0	0	0	0	0	0
63372	North England	45	control	706527	2014-11-25	5.45	0	0	0	0	0	0	0	0	0	0	0	0	0	0	0	0	0	0	0	0	0	0	0	0	3	0	0	0	0	0	0	0	0	0	0	0	0	0	0	0	0	0	0
509	North East Peak District	16	control	716478	2015-04-08	41.44	0	0	0	0	0	0	30	0	0	0	0	0	2	0	0	0	0	0	0	0	0	0	0	0	0	0	1	0	0	0	0	0	0	0	0	0	0	0	0	0	0	0	2
1573	South Pennines	15	downstream	716524	2015-04-08	56.17	0	0	0	0	0	0	3	0	0	0	0	0	0	0	0	0	0	0	0	0	0	0	0	0	0	0	0	0	0	0	0	0	0	0	0	0	0	0	0	0	0	0	0
1580	North East Peak District	16	downstream	716535	2015-04-08	59.97	0	0	0	0	0	0	14	4	0	0	0	0	0	0	0	0	0	0	0	0	0	0	0	0	0	0	0	0	0	0	0	0	0	0	0	0	0	0	0	0	0	0	0
473	North East Peak District	10	control	716689	2015-04-10	11.28	0	0	0	0	0	0	12	6	0	0	0	0	0	0	0	0	0	0	0	0	0	0	0	0	1	0	0	0	0	0	0	0	0	0	0	0	0	0	0	0	0	0	0
50031	Midlands	40	control	716700	2015-04-10	73.7	0	0	0	0	0	0	23	0	0	0	0	0	0	0	2	0	1	66	0	0	0	0	0	0	0	0	0	0	0	0	0	0	0	2	5	0	0	0	0	0	1	0	0
142369	North East Peak District	10	downstream	716702	2015-04-10	49.49	0	0	0	0	0	0	9	0	0	0	0	0	0	0	0	0	0	2	0	0	0	0	0	0	0	0	0	0	0	0	0	0	0	0	0	0	0	0	0	0	0	0	0
152682	Yorkshire Dales	7	downstream	716715	2015-04-10	53.14	0	0	0	0	0	0	94	3	0	0	0	0	0	0	0	0	0	36	0	0	0	0	0	0	0	0	0	0	0	0	0	0	0	0	7	0	0	0	0	0	0	0	6
68458	South Pennines	56	downstream	716799	2015-04-13	50.62	0	0	0	0	0	0	48	1	1	0	0	0	0	0	0	0	0	3	0	0	0	0	0	0	0	0	2	0	0	0	0	1	0	0	0	0	0	0	0	0	0	0	0
69430	South Pennines	56	control	716816	2015-04-13	33.87	0	0	0	0	0	0	33	0	0	0	0	0	0	0	0	0	0	2	0	0	0	0	0	0	0	0	1	0	0	0	0	1	0	1	0	0	0	0	0	0	0	0	3
77580	South West Peak District	58	downstream	716869	2015-04-14	26.3	0	0	0	0	0	0	60	0	0	0	0	0	0	0	0	0	0	1	0	0	0	0	0	0	0	0	0	0	0	0	0	2	0	0	7	0	0	0	0	0	0	0	2
465	Yorkshire Dales	8	downstream	717276	2015-04-17	24.18	0	0	0	0	0	0	98	0	0	0	0	0	0	0	0	0	0	5	2	0	0	0	0	0	0	0	0	0	0	0	0	2	0	0	0	0	0	0	0	0	0	0	1
118	North East Peak District	1	downstream	717285	2015-04-17	21.88	0	0	0	0	0	8	200	1	0	0	0	0	0	0	0	0	0	0	0	0	0	0	0	0	0	0	0	0	0	0	0	0	0	0	0	0	0	0	0	0	0	0	1
1758	North England	18	downstream	717317	2015-04-17	23.24	0	0	0	0	0	27	128	28	0	0	0	0	0	0	0	0	0	0	0	0	0	0	0	0	0	0	0	0	0	0	0	0	0	0	3	0	0	0	0	0	0	0	2
418	North East Peak District	2	control	717331	2015-04-17	18.55	0	0	0	0	0	0	3	0	0	0	0	0	0	0	0	0	0	0	0	0	0	0	0	0	0	0	0	0	0	0	0	0	0	0	0	0	0	0	0	0	0	0	0
1759	North England	18	control	717337	2015-04-17	30.25	0	0	0	0	0	9	48	6	0	0	0	0	0	0	0	0	0	0	0	0	0	0	0	0	0	0	0	0	0	0	0	0	0	0	0	0	0	0	0	0	0	0	1
159064	North England	47	control	717377	2015-04-20	19.83	0	0	0	0	5	0	190	0	0	0	0	0	0	0	0	0	0	0	0	0	7	0	0	0	10	0	0	0	0	0	0	0	0	0	0	0	0	0	0	0	0	0	0
1240	North East Peak District	3	control	717396	2015-04-20	23.09	0	0	0	0	0	0	54	0	0	0	0	0	0	0	0	0	0	0	0	0	0	0	0	0	0	0	0	0	0	0	0	0	0	0	0	0	0	0	0	0	0	0	65
51392	Midlands	40	downstream	717406	2015-04-20	72.65	0	0	0	0	0	0	16	0	0	0	0	0	0	0	2	0	0	51	1	0	0	0	0	0	0	0	0	0	0	0	0	0	0	0	8	0	0	0	0	0	4	0	0
64262	North England	47	downstream	717409	2015-04-20	14.88	0	0	0	0	12	0	110	0	0	0	0	0	0	0	0	0	0	0	0	0	0	0	0	0	0	0	0	0	0	0	0	0	0	0	6	0	0	0	0	0	0	0	0
200	North East Peak District	3	downstream	717411	2015-04-20	28.61	0	0	0	0	0	0	23	0	0	0	0	0	0	0	0	0	0	0	0	0	0	0	0	0	0	0	1	0	0	0	0	0	0	0	0	0	0	0	0	0	0	0	1
148	North East Peak District	2	downstream	717443	2015-04-20	29.38	0	0	0	0	0	0	62	0	0	0	0	0	0	0	0	0	0	2	0	0	0	0	0	0	0	0	0	0	0	0	0	0	0	0	3	0	0	0	0	0	0	0	0
154138	North England	66	control	717512	2015-04-21	36.25	0	0	0	0	7	0	75	0	0	0	0	0	0	0	0	0	0	0	0	0	0	0	0	0	4	0	0	0	0	0	0	9	0	0	46	0	0	0	0	0	0	0	0
63855	North England	66	downstream	717554	2015-04-21	18.32	0	0	0	0	0	0	39	0	0	0	0	0	0	0	0	0	0	0	0	0	0	0	0	0	0	0	0	0	0	0	0	0	0	0	14	0	0	0	0	0	0	0	0
158815	South West Peak District	58	control	717577	2015-04-21	23.25	0	0	0	0	0	0	117	0	0	0	0	0	0	0	0	0	0	0	0	0	0	0	0	0	0	0	0	0	0	0	0	0	0	0	0	0	0	0	0	0	0	0	11
68759	Yorkshire Dales	49	downstream	717730	2015-04-22	36.99	0	0	0	0	0	0	167	0	0	0	0	0	0	0	0	2	0	6	0	0	0	0	0	0	0	0	0	0	0	0	0	4	0	0	0	0	0	0	0	0	0	0	0
51065	Midlands	38	control	717800	2015-04-22	63.57	0	0	0	0	0	0	7	0	0	0	0	0	0	0	3	0	0	11	0	0	0	0	0	0	0	0	8	0	0	0	0	0	0	3	1	0	0	0	0	0	0	0	0
65118	Yorkshire Dales	49	control	717954	2015-04-23	8.18	0	0	0	0	0	0	100	0	0	0	0	0	0	0	0	0	0	0	0	0	0	0	0	0	0	0	0	0	0	0	0	0	0	0	0	0	0	0	0	0	0	0	0
152858	North East Peak District	53	control	718008	2015-04-23	24.16	0	0	0	0	0	0	6	0	0	0	0	0	0	0	0	0	0	0	0	0	0	0	0	0	0	0	0	0	0	0	0	0	0	0	0	0	0	0	0	0	0	0	1
158760	North East Peak District	1	control	718184	2015-04-24	23.25	0	0	0	0	0	0	23	0	0	0	0	0	0	0	0	0	0	0	0	0	0	0	0	0	5	0	0	0	0	0	0	0	0	0	1	0	0	0	0	0	0	0	2
67572	North England	67	control	718186	2015-04-24	19.05	0	0	0	0	77	0	146	0	0	0	0	0	0	0	0	0	0	0	0	0	0	0	0	0	5	0	0	0	0	0	0	0	0	0	1	0	0	0	0	0	0	0	0
78696	North England	45	downstream	718191	2015-04-24	3.56	0	0	0	0	60	0	17	0	0	0	0	0	0	0	0	0	0	0	0	0	4	2	8	0	6	0	0	0	0	0	0	0	0	0	0	0	0	0	0	0	0	0	0
157164	North England	67	downstream	718212	2015-04-24	19.6	0	0	0	0	12	0	167	0	0	0	0	0	0	0	0	0	0	0	0	0	0	0	0	0	1	0	0	0	0	0	0	0	0	0	6	0	0	0	0	0	0	0	0
46924	South West Peak District	36	downstream	718354	2015-04-27	28.29	0	0	0	0	0	0	92	14	0	0	0	0	0	0	0	0	0	4	0	0	0	0	0	0	0	0	0	0	0	0	0	0	0	0	2	0	0	0	0	0	0	0	2
1153	Yorkshire Dales	60	control	718362	2015-04-27	33.73	0	0	0	0	0	0	47	11	0	0	0	0	0	0	0	0	0	1	0	0	0	0	0	0	0	0	0	0	0	0	0	0	0	0	13	0	0	0	0	0	0	0	7
97161	South West Peak District	36	control	718400	2015-04-27	26.35	0	0	0	0	0	0	301	0	0	0	0	0	0	0	0	0	0	0	0	0	0	0	0	0	0	0	0	0	0	0	0	0	0	0	2	0	0	0	0	0	0	0	7
1587	South Pennines	12	control	718497	2015-04-28	27.57	0	0	0	0	0	0	35	2	0	0	0	0	0	0	0	0	0	0	0	0	0	0	0	0	0	0	8	0	0	0	0	0	0	0	0	0	0	0	0	0	0	0	0
1169	South Pennines	12	downstream	718553	2015-04-28	17.05	0	0	0	0	0	0	70	0	0	0	0	0	0	0	0	0	0	0	0	0	0	0	0	0	0	0	0	0	0	0	0	0	0	0	0	0	0	0	0	0	0	0	0
1576	Yorkshire Dales	60	downstream	718581	2015-04-28	18.45	0	0	0	0	0	0	150	0	0	0	0	0	0	0	0	0	0	0	0	0	0	0	0	0	0	0	0	0	0	0	0	0	0	0	0	0	0	0	0	0	0	0	17
155046	Midlands	39	downstream	718671	2015-04-29	76.02	0	0	0	0	0	0	11	0	0	0	0	0	0	0	1	0	0	18	2	0	0	0	0	0	0	0	0	0	0	0	0	0	0	9	15	0	0	0	0	0	0	0	0
158753	South Pennines	15	control	718716	2015-04-29	15.12	0	0	0	0	0	11	196	0	0	0	0	0	0	0	0	0	0	0	0	0	0	0	0	0	0	0	0	0	0	0	0	0	0	0	0	0	0	0	0	0	0	0	1
50020	Midlands	39	control	718743	2015-04-29	75.44	0	0	0	0	0	0	21	0	0	0	0	0	0	0	0	0	0	100	0	0	0	0	0	0	0	0	0	0	0	0	0	0	0	0	18	0	0	0	0	0	0	0	0
936	Yorkshire Dales	7	control	718748	2015-04-29	69.86	0	0	0	0	0	0	18	0	0	0	0	0	0	0	0	0	0	12	0	0	0	0	0	0	0	0	0	0	0	0	0	0	0	5	2	0	0	0	0	0	1	0	0
163464	Yorkshire Dales	65	downstream	718750	2015-04-29	21.05	0	0	0	0	0	0	13	0	0	0	0	0	0	0	1	0	0	0	2	0	0	0	0	0	0	0	0	0	0	0	0	0	0	0	0	0	0	0	0	0	0	0	8
638	Yorkshire Dales	8	control	718756	2015-04-29	9.21	0	0	0	0	0	0	154	0	0	0	0	0	0	0	0	0	0	1	0	0	0	0	0	0	0	0	0	0	0	0	0	0	0	0	0	0	0	0	0	0	0	0	1
67130	South West Peak District	54	downstream	718808	2015-04-30	42.7	0	0	0	0	0	0	65	0	0	0	0	0	0	0	0	0	0	1	11	2	0	0	0	0	0	0	0	0	0	0	0	0	0	0	3	0	0	0	0	0	0	0	0
254	South Pennines	61	downstream	718842	2015-04-30	31.19	0	0	0	0	0	0	50	0	0	0	0	0	0	0	0	0	0	0	0	0	0	0	0	0	0	0	0	0	0	0	0	0	0	0	1	0	0	0	0	0	0	0	1
161362	South West Peak District	68	downstream	718844	2015-04-30	28.55	0	0	0	0	0	0	123	0	0	0	0	0	1	0	0	0	0	6	0	1	0	0	0	0	0	0	0	0	0	0	0	7	0	0	0	0	0	0	0	0	0	0	0
175545	Yorkshire Dales	17	control	718895	2015-04-28	12.24	0	0	0	0	7	28	64	0	0	0	0	0	0	0	0	0	0	0	0	0	0	0	0	0	0	0	0	0	0	0	0	0	0	0	0	0	0	0	0	0	0	0	19
67808	South West Peak District	68	control	718928	2015-05-01	23.79	0	0	0	0	0	0	170	0	0	0	0	0	0	0	0	0	0	2	0	0	0	0	0	0	0	0	0	0	0	0	0	0	0	0	3	0	0	0	0	0	0	0	0
178505	South West Peak District	54	control	719213	2015-05-07	36.66	0	0	0	0	0	0	187	1	0	0	0	3	1	0	0	0	0	0	0	0	0	0	0	0	0	0	0	0	0	0	0	0	0	0	0	0	0	0	0	0	0	0	0
52427	Midlands	41	downstream	719378	2015-05-11	59.89	0	0	0	0	0	0	33	0	0	0	0	0	0	0	0	0	0	19	0	0	0	0	0	0	0	0	0	0	0	0	0	0	0	1	28	0	0	0	0	0	1	0	0
55583	Midlands	43	downstream	719388	2015-05-11	48.15	0	0	0	0	0	0	82	1	2	0	0	0	0	0	0	0	0	51	0	0	0	0	0	0	0	0	0	0	0	0	0	2	0	0	10	0	0	0	0	0	0	0	0
51073	Midlands	41	control	719394	2015-05-11	60.88	0	0	0	0	0	0	105	0	0	0	0	0	0	0	1	0	0	30	0	0	0	0	0	0	0	0	0	0	0	0	0	0	0	1	7	0	0	0	0	0	0	0	0
55714	Midlands	43	control	719402	2015-05-11	45.25	0	0	0	0	0	0	187	0	0	0	0	0	0	0	0	1	0	14	0	0	0	0	0	0	0	0	0	0	0	0	0	0	0	8	5	0	0	0	0	0	0	0	0
52186	South West Peak District	42	control	719507	2015-05-12	47.48	0	0	0	0	0	0	145	0	0	0	0	0	0	0	0	0	0	3	0	0	0	0	0	0	0	0	0	0	0	0	0	0	0	0	2	0	0	0	0	0	0	0	0
51715	South West Peak District	37	downstream	719516	2015-05-12	51.51	0	0	0	0	0	0	50	0	0	0	0	0	0	0	0	0	0	3	31	0	0	0	0	0	0	0	0	0	0	0	0	0	0	0	2	0	0	0	0	0	0	0	0
158814	South Pennines	51	control	719536	2015-05-12	58.33	0	0	0	0	0	0	59	0	0	0	0	0	2	0	0	0	0	1	0	0	0	0	0	0	0	0	0	0	0	0	0	0	0	0	0	0	0	0	0	0	1	0	0
50378	South West Peak District	37	control	719537	2015-05-12	37.73	0	0	0	0	0	0	108	0	0	0	0	0	0	0	0	0	0	0	0	0	0	0	0	0	0	0	0	0	0	0	0	0	0	0	2	0	0	0	0	0	0	0	0
69134	South Pennines	51	downstream	719720	2015-05-14	39.03	0	0	0	0	0	0	184	0	0	0	0	1	0	0	0	0	0	3	0	0	0	0	0	0	0	0	0	0	0	0	0	0	0	0	0	0	0	0	0	0	0	0	0
63372	North England	45	control	719748	2015-05-14	12.33	0	0	0	0	16	0	87	0	0	0	0	0	0	0	0	0	0	0	0	0	0	3	4	0	17	0	0	0	0	0	0	0	0	0	0	0	0	0	0	0	0	0	0
1584	North East Peak District	13	downstream	719756	2015-05-14	25.17	0	0	0	0	0	0	115	0	0	0	0	0	0	0	0	0	0	3	0	0	0	0	0	0	0	0	0	0	0	0	0	0	0	0	2	0	0	0	0	0	0	0	0
22	Yorkshire Dales	65	control	719870	2015-05-15	28.23	0	0	0	0	0	0	72	11	0	0	0	1	15	0	0	0	0	0	0	0	0	0	0	0	0	0	0	0	0	0	0	0	0	0	0	0	0	0	0	0	0	0	0
74823	South Pennines	61	control	719943	2015-05-18	10	0	0	0	0	0	11	67	0	0	0	0	0	0	0	0	0	0	0	0	0	0	0	0	0	21	0	0	0	0	0	0	0	0	0	0	0	0	0	0	0	0	0	0
1594	Yorkshire Dales	17	downstream	719949	2015-05-18	34.68	0	0	0	0	0	0	124	0	0	0	0	0	0	0	0	0	0	0	0	0	0	0	0	0	0	0	0	0	0	0	0	0	0	0	2	0	0	0	0	0	0	0	0
47592	Midlands	38	downstream	720103	2015-05-22	63.65	0	0	0	0	0	0	83	0	0	0	0	0	0	0	3	0	0	43	0	0	0	0	0	0	0	0	0	0	0	0	0	0	0	1	1	0	0	0	0	0	2	0	0
75896	North East Peak District	13	control	720213	2015-05-26	3.33	0	0	0	0	0	1	29	2	0	0	0	0	0	0	0	0	0	0	0	0	0	0	0	0	0	0	0	0	0	0	0	0	0	0	0	0	0	0	0	0	0	0	0
68458	South Pennines	56	downstream	724168	2015-09-01	46.26	0	0	0	0	0	0	37	11	0	0	0	0	0	0	0	0	0	0	21	67	0	0	0	0	0	0	0	0	0	0	0	1	0	0	0	0	0	0	0	0	0	0	0
51065	Midlands	38	control	724218	2015-09-02	76.24	0	0	0	0	0	0	19	0	0	0	0	0	0	0	3	0	0	68	0	0	0	0	0	0	0	0	3	0	0	0	0	0	0	3	15	0	0	0	0	0	0	0	0
51073	Midlands	41	control	724219	2015-09-02	74.26	0	0	0	0	0	0	0	0	0	0	0	0	0	0	3	0	1	85	0	0	0	0	0	0	0	0	0	0	0	0	0	0	0	13	35	0	0	0	0	0	0	0	0
52427	Midlands	41	downstream	724241	2015-09-02	39.86	0	0	0	0	0	0	3	0	0	0	0	0	0	0	0	0	1	35	0	3	0	0	0	0	0	0	0	0	0	0	0	0	0	2	223	0	0	0	0	0	0	0	0
69430	South Pennines	56	control	724299	2015-09-03	14.98	0	0	0	0	0	0	17	0	0	0	0	0	0	0	0	0	0	3	0	0	0	0	0	0	0	0	0	0	0	0	0	1	0	0	0	0	0	0	0	0	1	0	0
936	Yorkshire Dales	7	control	724479	2015-09-07	58.4	0	0	0	0	0	5	84	14	0	0	0	0	3	0	0	0	0	21	0	0	0	0	0	0	0	0	0	0	0	0	0	0	0	0	2	0	0	0	0	2	0	0	0
158814	South Pennines	51	control	724482	2015-09-07	35.4	0	0	0	0	0	0	208	0	0	0	0	0	0	0	0	0	0	0	0	0	0	0	0	0	0	0	0	0	0	0	0	0	0	7	8	0	0	0	0	0	0	0	0
254	South Pennines	61	downstream	724563	2015-09-08	60.99	0	0	0	0	0	0	20	9	0	0	0	0	3	0	0	0	0	69	0	0	0	0	0	0	0	0	0	0	0	0	0	0	0	0	128	0	0	0	0	0	0	0	0
1576	Yorkshire Dales	60	downstream	724688	2015-09-09	19.75	0	0	0	0	0	2	72	5	0	0	0	0	1	0	0	0	0	0	6	0	0	0	0	0	0	0	0	0	0	0	0	0	0	0	0	0	0	0	0	0	0	0	19
1153	Yorkshire Dales	60	control	724708	2015-09-09	26.19	0	0	0	0	0	1	56	6	0	0	0	0	1	0	0	0	0	2	0	0	0	0	0	0	0	0	0	0	0	0	0	9	0	0	59	0	0	0	0	0	0	0	7
638	Yorkshire Dales	8	control	724786	2015-09-10	15.4	0	0	0	0	0	0	166	0	0	0	0	0	0	0	0	0	0	0	0	0	0	0	0	0	0	0	0	0	0	0	0	0	0	0	9	0	0	0	0	0	0	0	0
157164	North England	67	downstream	724801	2015-09-10	28.23	0	0	0	0	0	0	220	0	0	0	0	0	0	0	0	0	0	0	0	0	0	0	0	0	0	0	0	0	0	0	0	0	0	0	51	0	0	0	0	0	0	0	0
163464	Yorkshire Dales	65	downstream	724816	2015-09-10	36.68	0	0	0	0	0	0	67	0	0	0	0	0	0	0	0	0	0	5	0	0	0	0	0	0	0	0	0	0	0	0	0	0	0	0	10	0	0	0	0	0	0	0	3
22	Yorkshire Dales	65	control	724822	2015-09-10	29.98	0	0	0	0	0	0	812	3	0	0	0	0	0	0	0	0	0	0	0	0	0	0	0	0	0	0	1	0	0	0	0	0	0	0	9	0	0	0	0	0	0	0	2
200	North East Peak District	3	downstream	724967	2015-09-14	45.62	0	0	0	0	0	0	2	4	0	0	0	0	2	34	0	0	0	3	79	0	0	0	0	0	0	0	0	0	0	0	0	0	0	0	1	0	0	0	0	0	0	0	0
51392	Midlands	40	downstream	724979	2015-09-14	88.71	0	0	0	0	0	0	3	0	0	0	0	0	0	0	4	7	0	208	0	0	0	0	0	0	0	0	1	0	0	0	0	3	0	0	6	0	0	0	0	0	1	0	0
159064	North England	47	control	725258	2015-09-16	23.56	0	0	0	0	0	0	283	0	0	0	0	0	0	0	0	0	0	0	0	0	0	0	0	0	12	0	0	0	0	0	0	0	0	0	0	0	0	0	0	0	0	0	0
1573	South Pennines	15	downstream	725259	2015-09-17	30.41	0	0	0	0	0	0	77	0	0	0	0	0	0	0	0	0	0	2	6	0	0	0	0	0	0	0	1	0	0	0	0	0	0	0	8	0	0	0	0	0	0	1	0
465	Yorkshire Dales	8	downstream	725276	2015-09-17	23.54	0	0	0	0	0	0	180	0	0	0	0	0	0	0	0	0	0	9	2	4	0	0	0	0	0	0	0	0	0	0	0	0	0	0	26	0	0	0	0	0	0	0	1
50020	Midlands	39	control	725281	2015-09-17	71.09	0	0	0	0	0	0	5	0	0	0	0	1	0	0	5	0	0	65	0	0	0	0	0	0	0	0	0	0	0	0	0	0	0	1	28	0	0	0	0	0	0	0	0
51715	South West Peak District	37	downstream	725293	2015-09-17	74.38	0	0	0	0	0	0	9	0	0	0	0	0	0	0	0	0	0	12	10	20	0	0	0	0	0	0	0	0	0	0	0	0	0	1	4	0	0	0	0	0	0	0	0
67572	North England	67	control	725294	2015-09-17	23.53	0	0	0	0	0	0	255	0	0	0	0	0	0	0	0	0	0	0	0	0	0	0	0	0	3	0	0	0	0	0	0	0	0	0	1	0	0	0	0	0	0	0	0
50378	South West Peak District	37	control	725310	2015-09-17	48.1	0	0	0	0	0	0	106	0	0	0	0	0	0	0	0	0	0	6	0	0	0	0	0	0	0	0	0	0	0	0	0	2	0	0	50	0	0	0	0	0	0	0	0
152682	Yorkshire Dales	7	downstream	725462	2015-09-18	52.52	0	0	0	0	0	0	58	51	7	0	0	0	11	0	0	0	0	10	0	0	0	0	0	0	0	0	0	0	0	0	0	1	0	1	12	0	0	0	0	0	0	0	0
148	North East Peak District	2	downstream	725639	2015-09-22	53.16	0	0	0	0	0	0	25	0	0	0	0	0	1	0	0	0	0	2	3	0	0	0	0	0	0	0	0	0	0	0	0	0	0	1	20	0	0	0	0	0	0	0	1
142369	North East Peak District	10	downstream	725658	2015-09-22	32.7	0	0	0	0	0	0	138	32	0	0	0	0	0	0	0	0	0	3	77	0	0	0	0	0	0	0	0	0	0	0	0	0	0	0	0	0	0	0	0	4	0	0	0
74823	South Pennines	61	control	725670	2015-09-22	13.59	0	0	0	0	0	0	90	0	0	0	0	0	9	0	0	0	0	0	0	0	0	0	0	0	6	0	0	0	0	0	0	0	0	0	0	0	0	0	0	0	0	0	0
155046	Midlands	39	downstream	725745	2015-09-23	85.49	0	0	0	0	0	0	32	0	0	0	0	0	0	0	0	2	1	191	0	0	0	0	0	0	0	0	0	0	0	0	0	0	0	5	19	0	0	0	0	0	1	0	0
50031	Midlands	40	control	725756	2015-09-23	81.8	0	0	0	0	0	0	9	0	0	0	0	0	1	0	0	2	0	98	0	0	0	0	0	0	0	0	0	0	0	0	0	0	0	2	92	0	0	0	0	0	4	0	0
158753	South Pennines	15	control	725765	2015-09-23	14.11	0	0	0	0	0	0	96	5	0	0	0	0	0	0	0	0	0	0	0	0	0	0	0	0	0	0	0	0	0	0	0	0	0	0	0	0	0	0	0	0	0	0	4
1587	South Pennines	12	control	725851	2015-09-24	19.64	0	0	0	0	0	0	26	1	0	0	0	0	0	0	0	0	0	0	0	0	0	0	0	0	0	0	0	0	0	0	0	0	0	0	0	0	0	0	0	0	0	0	0
1594	Yorkshire Dales	17	downstream	725859	2015-09-23	29.52	0	0	0	0	0	0	129	1	0	0	0	0	0	0	0	0	0	15	0	0	0	0	0	0	0	0	0	0	0	0	0	0	0	0	3	0	0	0	0	0	0	0	0
175545	Yorkshire Dales	17	control	725860	2015-09-24	11.68	0	0	0	0	0	0	112	0	0	0	0	0	0	0	0	0	0	2	0	0	0	0	0	0	0	0	0	0	0	0	0	0	0	0	0	0	0	0	0	0	0	0	7
1169	South Pennines	12	downstream	725861	2015-09-23	15.35	0	0	0	0	0	0	114	0	0	0	0	0	2	0	0	0	0	1	0	0	0	0	0	0	3	0	0	0	0	0	0	0	0	0	0	0	0	0	0	0	0	1	0
418	North East Peak District	2	control	725967	2015-09-25	11.78	0	0	0	0	0	2	28	4	0	0	0	0	1	0	0	0	0	1	0	0	0	0	0	0	0	0	0	0	0	0	0	1	0	0	1	0	0	0	0	1	0	0	3
473	North East Peak District	10	control	725973	2015-09-25	12.97	0	0	0	0	0	0	18	1	0	0	0	0	0	0	0	0	0	0	0	0	0	0	0	0	0	0	0	0	0	0	0	0	0	0	0	0	0	0	0	0	0	0	0
118	North East Peak District	1	downstream	725976	2015-09-25	23.03	0	0	0	0	0	0	48	0	0	0	0	0	1	0	0	0	0	0	0	0	0	0	0	0	3	0	0	0	0	0	0	0	0	0	0	0	0	0	0	0	0	0	4
1580	North East Peak District	16	downstream	725977	2015-09-25	35.41	0	0	0	0	0	1	26	6	0	0	0	0	3	0	0	0	0	4	90	0	0	0	0	0	0	0	0	0	0	0	0	1	0	0	5	0	0	0	0	0	0	0	0
509	North East Peak District	16	control	725979	2015-09-25	23.9	0	0	0	0	0	5	31	0	0	0	0	0	1	0	1	0	0	0	2	0	0	0	0	0	0	0	0	0	0	0	0	0	0	0	1	0	1	0	0	1	0	0	0
52186	South West Peak District	42	control	726091	2015-09-28	71.76	0	0	0	0	0	0	40	0	0	0	0	1	0	0	0	0	0	36	0	0	0	0	0	0	0	0	0	0	0	0	0	2	0	10	21	0	1	0	0	0	0	0	0
64262	North England	47	downstream	726095	2015-09-28	31.05	0	0	0	0	0	0	225	0	0	0	0	0	0	0	0	0	0	1	0	0	0	0	0	0	0	0	0	0	0	0	0	11	0	0	1	0	0	0	0	0	0	0	0
55714	Midlands	43	control	726100	2015-09-28	73.56	0	0	0	0	0	0	19	0	0	0	0	0	0	0	0	0	1	31	0	0	0	0	0	0	0	0	0	0	0	0	0	0	0	6	89	0	0	0	0	0	0	0	0
67130	South West Peak District	54	downstream	726101	2015-09-28	46.45	0	0	0	0	0	0	93	8	0	0	0	0	0	0	0	0	0	16	0	15	0	0	0	0	0	0	3	0	0	0	0	4	0	0	10	0	0	0	0	0	0	0	0
55583	Midlands	43	downstream	726124	2015-09-28	72.84	0	0	0	0	0	0	23	0	0	0	0	0	0	0	6	2	2	61	2	0	0	0	0	0	0	0	1	0	0	0	0	8	0	6	88	0	0	0	0	0	0	0	2
158760	North East Peak District	1	control	726209	2015-09-29	14.32	0	0	0	0	0	0	43	0	0	0	0	0	0	0	0	0	0	0	0	0	0	0	0	0	16	0	5	0	0	0	0	0	0	0	0	0	0	0	0	0	0	0	0
1584	North East Peak District	13	downstream	726226	2015-09-29	41.51	0	0	0	0	0	0	36	0	0	0	0	0	0	0	0	0	0	6	0	0	0	0	0	0	0	0	0	0	0	0	0	0	0	0	11	0	0	0	0	0	0	0	0
75896	North East Peak District	13	control	726385	2015-09-30	17.02	0	0	0	0	0	29	80	6	0	0	0	0	4	0	0	0	0	4	0	0	0	0	0	0	0	0	0	0	0	0	0	0	0	0	2	0	0	0	0	0	0	0	0
178505	South West Peak District	54	control	726482	2015-10-01	74.26	0	0	0	0	0	0	5	0	0	0	0	0	2	0	1	0	0	14	0	0	0	0	0	0	0	0	0	0	0	0	0	7	0	0	54	0	0	0	0	0	0	0	0
67808	South West Peak District	68	control	726538	2015-10-02	31.37	0	0	0	0	0	0	162	0	0	0	0	0	2	0	0	0	0	0	0	0	0	0	0	0	0	0	0	0	0	0	0	13	0	0	69	0	0	0	0	0	0	0	1
68759	Yorkshire Dales	49	downstream	726872	2015-10-06	45.59	0	0	0	0	0	0	98	0	1	1	0	0	0	0	0	0	0	1	2	0	0	0	0	0	0	0	0	0	0	0	0	7	0	1	2	0	0	0	0	0	0	0	3
154138	North England	66	control	726977	2015-10-07	41.86	0	0	0	0	0	0	98	0	0	0	0	0	0	0	0	0	0	0	0	0	0	0	0	0	0	0	0	0	0	0	0	122	0	0	35	0	0	0	0	0	0	0	0
63855	North England	66	downstream	726978	2015-10-07	36.82	0	0	0	0	0	0	62	1	0	0	0	0	0	0	0	0	0	1	3	17	0	0	0	0	1	0	0	0	0	0	0	23	0	0	1	0	0	0	0	0	0	0	0
97161	South West Peak District	36	control	726985	2015-10-07	27.09	0	0	0	0	0	0	108	0	0	0	0	0	0	0	0	0	0	0	0	0	0	0	0	0	0	0	0	0	0	0	0	0	0	0	1	0	0	0	0	0	0	0	3
158815	South West Peak District	58	control	727123	2015-10-08	22.19	0	0	0	0	0	0	264	0	0	0	0	0	0	0	0	0	0	2	0	0	0	0	0	0	0	0	0	0	0	0	0	1	0	0	0	0	0	0	0	0	0	0	0
1758	North England	18	downstream	727200	2015-10-09	49.55	0	0	0	0	0	0	54	18	1	0	0	0	0	0	0	0	0	2	0	0	0	0	0	0	0	0	0	0	0	0	0	0	0	6	23	0	0	0	0	0	0	0	0
152858	North East Peak District	53	control	727220	2015-10-09	22.21	0	0	0	0	0	0	104	0	0	0	0	0	0	0	0	0	0	0	0	0	0	0	0	0	0	0	0	0	0	0	0	0	0	0	0	0	0	0	0	0	0	0	2
1240	North East Peak District	3	control	727845	2015-10-13	24.78	0	0	0	0	0	0	29	82	0	0	0	0	1	0	0	0	0	0	0	0	0	0	0	0	0	0	0	0	0	0	0	2	0	0	0	0	0	0	0	0	0	0	24
161362	South West Peak District	68	downstream	728789	2015-10-21	40.02	0	0	0	0	0	0	134	0	0	0	0	1	0	0	0	0	0	14	1	0	0	0	0	0	0	0	0	0	0	0	0	0	0	0	34	0	0	0	0	0	0	0	0
69134	South Pennines	51	downstream	728960	2015-10-23	74.75	0	0	0	0	0	0	31	0	0	0	0	0	0	0	0	0	0	112	0	12	0	0	0	0	0	0	0	0	0	0	0	5	0	1	50	0	0	0	0	0	0	0	0
1759	North England	18	control	729098	2015-10-27	13.08	0	0	0	0	0	0	21	0	0	0	0	0	0	0	0	0	0	0	0	0	0	0	0	0	0	0	0	0	0	0	0	0	0	0	0	0	0	0	0	0	0	0	5
65118	Yorkshire Dales	49	control	729107	2015-10-23	18.13	0	0	0	0	0	0	187	0	0	0	0	0	0	0	0	0	0	0	0	0	0	0	0	0	0	0	0	0	0	0	0	0	0	0	0	0	0	0	0	0	0	0	0
78696	North England	45	downstream	729130	2015-10-26	13.36	0	0	0	0	28	0	60	0	0	0	0	0	0	0	0	0	0	0	0	0	88	33	3	0	9	0	0	0	0	0	0	0	0	0	1	0	0	0	0	0	0	0	0
77580	South West Peak District	58	downstream	729254	2015-10-29	25.31	0	0	0	0	0	0	292	0	0	0	0	0	0	0	0	0	0	1	0	1	0	0	0	0	0	0	0	0	0	0	0	4	0	0	0	0	0	0	0	0	0	0	0
47592	Midlands	38	downstream	729341	2015-11-02	77.97	0	0	0	0	0	0	6	0	0	0	0	0	0	0	0	0	0	89	0	0	0	0	0	0	0	0	1	0	0	0	0	0	0	4	38	0	0	0	0	0	0	0	0
63372	North England	45	control	729643	2015-11-09	6.7	0	0	0	0	2	0	59	0	0	0	0	0	0	0	0	0	0	0	0	0	0	35	0	8	23	0	0	0	0	0	0	0	0	0	0	0	0	0	0	0	0	0	0
46924	South West Peak District	36	downstream	730673	2015-11-18	28.39	0	0	0	0	0	0	196	5	0	0	0	0	0	0	0	0	0	7	0	8	0	0	0	0	0	0	0	0	0	0	0	1	0	0	3	0	0	0	0	0	0	0	2
178505	South West Peak District	54	control	736272	2016-04-01	56.38	0	0	0	0	0	0	43	2	0	0	0	0	0	0	0	0	0	8	0	0	0	0	0	0	0	0	0	0	0	0	0	0	0	0	0	0	0	0	0	0	0	0	0
1573	South Pennines	15	downstream	736427	2016-04-05	28.79	0	0	0	0	0	0	34	0	0	0	0	0	0	0	0	0	0	0	0	0	0	0	0	0	0	0	0	0	0	0	0	0	0	0	0	0	0	0	0	0	0	0	2
51392	Midlands	40	downstream	736569	2016-04-06	78.21	0	0	0	0	0	0	10	0	0	0	0	0	0	0	0	0	0	58	1	4	0	0	0	0	0	0	0	0	0	0	0	0	0	1	7	0	0	0	0	0	11	0	0
1153	Yorkshire Dales	60	control	736761	2016-04-11	33.67	0	0	0	0	0	1	42	28	0	0	0	0	1	0	0	0	0	0	0	0	0	0	0	0	0	0	0	0	0	0	0	0	0	0	1	0	0	0	0	0	0	0	0
936	Yorkshire Dales	7	control	736770	2016-04-11	57.21	0	0	0	0	0	0	90	4	0	0	0	0	0	0	0	0	0	3	0	0	0	0	0	0	0	0	0	0	0	0	0	0	0	0	2	0	0	0	0	0	0	0	0
152682	Yorkshire Dales	7	downstream	736812	2016-04-12	40.43	0	0	0	0	0	0	70	9	1	0	0	0	1	0	0	0	0	3	0	0	0	0	0	0	0	0	0	0	0	0	0	0	0	0	1	0	0	0	0	0	0	0	0
69430	South Pennines	56	control	736893	2016-04-13	35.48	0	0	0	0	0	0	38	0	0	0	0	0	0	0	0	0	0	0	0	0	0	0	0	0	0	0	0	0	0	0	0	0	0	0	0	0	0	0	0	0	0	0	0
161362	South West Peak District	68	downstream	736912	2016-04-13	44.17	0	0	0	0	0	0	36	0	0	0	0	0	0	0	0	0	0	8	0	0	0	0	0	0	0	0	0	0	0	0	0	9	0	1	4	0	0	0	0	0	0	0	0
67808	South West Peak District	68	control	736934	2016-04-13	25.95	0	0	0	0	0	0	200	0	0	0	0	0	0	0	0	0	0	1	0	0	0	0	0	0	0	0	0	0	0	0	0	12	0	0	2	0	0	0	0	0	0	0	2
50020	Midlands	39	control	736935	2016-04-13	72.58	0	0	0	0	0	0	14	2	0	0	0	0	0	0	0	1	0	26	3	0	0	0	0	0	0	0	0	0	0	0	0	0	0	0	1	0	0	0	0	0	1	0	0
64262	North England	47	downstream	736943	2016-04-13	23.41	0	0	0	0	4	0	103	0	0	0	0	0	0	0	0	0	0	0	0	0	0	0	0	0	0	0	0	0	0	0	0	0	0	0	10	0	0	0	0	0	0	0	0
63855	North England	66	downstream	736989	2016-04-14	30.84	0	0	0	0	0	0	57	0	0	0	0	0	0	0	0	0	0	1	9	3	0	0	0	0	0	0	0	0	0	0	0	2	0	0	2	0	0	0	0	0	0	0	0
67572	North England	67	control	737004	2016-04-14	10.56	0	0	0	0	240	0	28	0	0	0	0	0	0	0	0	0	0	2	0	0	0	0	0	0	1	0	0	0	0	0	0	0	0	0	0	0	0	0	0	0	0	0	0
50031	Midlands	40	control	737017	2016-04-14	83.5	0	0	0	0	0	0	10	2	0	0	0	0	0	0	0	3	0	145	0	0	0	0	0	0	0	0	0	0	0	0	0	1	0	0	15	0	0	0	0	0	6	0	0
154138	North England	66	control	737037	2016-04-14	15.37	0	0	0	0	10	0	208	0	0	0	0	0	0	0	0	0	0	0	0	0	0	0	0	0	0	0	0	0	0	0	0	0	0	0	1	0	0	0	0	0	0	0	0
148	North East Peak District	2	downstream	737167	2016-04-18	24.5	0	0	0	0	0	0	73	0	0	0	0	0	0	0	0	0	0	0	0	0	0	0	0	0	0	0	0	0	0	0	0	0	0	0	0	0	0	0	0	0	0	0	0
1758	North England	18	downstream	737184	2016-04-18	27.48	0	0	0	0	0	0	81	0	0	0	0	0	0	0	0	0	0	5	0	0	0	0	0	0	0	0	0	0	0	0	0	1	0	0	2	0	0	0	0	0	0	0	0
142369	North East Peak District	10	downstream	737190	2016-04-18	35.59	0	0	0	0	0	0	18	0	0	0	0	0	0	0	0	0	0	0	0	17	0	0	0	0	0	0	0	0	0	0	0	0	0	0	0	0	0	0	0	0	0	0	0
1580	North East Peak District	16	downstream	737201	2016-04-18	35.4	0	0	0	0	0	0	36	4	0	0	0	0	0	0	0	0	0	0	0	0	0	0	0	0	0	0	0	0	0	0	0	0	0	0	0	0	0	0	0	0	0	0	0
1759	North England	18	control	737212	2016-04-18	23.63	0	0	0	0	0	0	162	0	0	0	0	0	0	0	0	0	0	0	0	0	0	0	0	0	0	0	0	0	0	0	0	0	0	0	0	0	0	0	0	0	0	0	0
51073	Midlands	41	control	737291	2016-04-19	74.5	0	0	0	0	0	0	14	0	0	0	0	0	0	0	2	0	0	47	0	0	0	0	0	0	0	0	0	0	0	0	0	0	0	2	27	0	0	0	0	0	0	0	0
1576	Yorkshire Dales	60	downstream	737293	2016-04-19	13.87	0	0	0	0	0	0	30	10	0	0	0	0	0	0	0	0	0	0	0	0	0	0	0	0	0	0	0	0	0	0	0	0	0	0	0	0	0	0	0	0	0	0	0
51065	Midlands	38	control	737305	2016-04-19	60.03	0	0	0	0	0	0	8	0	0	0	0	0	0	0	2	0	0	9	0	0	0	0	0	0	0	0	0	0	0	0	0	0	0	0	5	0	0	0	0	0	0	0	1
47592	Midlands	38	downstream	737317	2016-04-19	77.66	0	0	0	0	0	0	3	0	0	0	0	0	0	0	0	0	2	75	0	0	0	0	0	0	0	0	0	0	0	0	0	0	0	4	35	0	0	0	0	0	1	0	0
52427	Midlands	41	downstream	737355	2016-04-19	50.19	0	0	0	0	0	0	72	0	0	0	0	0	0	0	0	0	0	21	0	0	0	0	0	0	0	0	0	0	0	0	0	0	0	0	3	0	0	0	1	0	1	0	0
200	North East Peak District	3	downstream	737404	2016-04-20	45.13	0	0	0	0	0	0	1	1	0	0	0	0	0	2	0	0	0	1	2	0	0	0	0	0	0	0	0	0	0	0	0	0	0	0	0	0	0	0	0	0	0	0	0
254	South Pennines	61	downstream	737419	2016-04-20	32.94	0	0	0	0	0	1	68	0	0	0	0	0	0	0	0	0	0	4	0	0	0	0	0	0	0	0	0	0	0	0	0	0	0	0	3	0	0	0	0	0	0	0	0
63372	North England	45	control	737430	2016-04-20	20.76	0	0	0	0	33	0	160	0	0	0	0	0	0	0	0	0	0	1	0	0	0	0	0	0	0	0	0	0	0	0	0	0	0	0	0	0	0	0	0	0	0	0	0
67595	North East Peak District	53	downstream	737437	2016-04-20	40.89	0	0	0	0	0	0	10	0	0	0	0	0	0	0	0	0	0	0	0	0	0	0	0	0	0	0	0	0	0	0	0	0	0	0	0	0	0	0	0	0	0	0	17
157164	North England	67	downstream	737566	2016-04-21	21.2	0	0	0	0	124	0	63	0	0	0	0	0	0	0	0	0	0	0	0	0	0	0	0	0	0	0	0	0	0	0	0	0	0	0	0	0	0	0	0	0	0	0	0
67130	South West Peak District	54	downstream	737579	2016-04-21	42.86	0	0	0	0	0	0	99	0	0	0	0	0	0	0	0	0	0	6	5	1	0	0	0	0	0	0	1	0	0	0	0	0	0	1	3	0	0	0	0	0	0	0	0
69134	South Pennines	51	downstream	737596	2016-04-21	47.19	0	0	0	0	0	0	165	0	0	0	0	0	0	0	0	0	0	0	0	0	0	0	0	0	0	0	0	0	0	0	0	0	0	0	0	0	0	0	0	0	0	0	0
158815	South West Peak District	58	control	737599	2016-04-21	23.1	0	0	0	0	0	0	164	0	0	0	0	0	0	0	0	0	0	0	0	0	0	0	0	0	0	0	0	0	0	0	0	0	0	0	0	0	0	0	0	0	0	0	5
77580	South West Peak District	58	downstream	737662	2016-04-22	25.56	0	0	0	0	0	0	191	0	0	0	0	0	0	0	0	0	0	0	0	0	0	0	0	0	1	0	0	0	0	0	0	1	0	0	0	0	0	0	0	0	0	0	0
158814	South Pennines	51	control	737664	2016-04-21	35.74	0	0	0	0	0	0	210	0	0	0	0	0	0	0	0	0	0	0	0	0	0	0	0	0	0	0	0	0	0	0	0	0	0	0	0	0	0	0	0	0	0	0	0
175545	Yorkshire Dales	17	control	737738	2016-04-25	21.21	0	0	0	0	0	24	53	4	0	0	0	0	0	0	0	0	0	0	0	0	0	0	0	0	0	0	0	0	0	0	0	0	0	0	0	0	0	0	0	0	0	0	1
158753	South Pennines	15	control	737757	2016-04-25	22.46	0	0	0	0	0	0	37	0	0	0	0	0	0	0	0	0	0	0	0	0	0	0	0	0	0	0	0	0	0	0	0	0	0	0	0	0	0	0	0	0	0	0	6
1240	North East Peak District	3	control	737765	2016-04-25	25.43	0	0	0	0	0	0	48	11	0	0	0	0	0	0	0	0	0	0	0	0	0	0	0	0	0	0	0	0	0	0	0	0	0	0	0	0	0	0	0	0	0	0	5
51715	South West Peak District	37	downstream	737895	2016-04-26	65.47	0	0	0	0	0	0	16	0	0	0	0	0	0	0	0	0	0	3	0	4	0	0	0	0	0	0	0	0	0	0	0	0	0	0	0	0	0	0	0	0	0	0	0
1594	Yorkshire Dales	17	downstream	737910	2016-04-26	27.96	0	0	0	0	0	28	170	0	0	0	0	0	1	0	0	0	0	0	0	0	0	0	0	0	0	0	0	0	0	0	0	0	0	0	0	0	0	0	0	0	0	0	0
465	Yorkshire Dales	8	downstream	737939	2016-04-26	19.47	0	0	0	0	0	0	167	0	0	0	0	0	0	0	0	0	0	0	0	0	0	0	0	0	0	0	0	0	0	0	0	6	0	0	0	0	0	0	0	0	0	0	5
155046	Midlands	39	downstream	737959	2016-04-26	55.95	0	0	0	0	0	0	37	0	0	0	0	0	0	0	0	0	0	36	0	0	0	0	0	0	0	0	0	0	0	0	0	0	0	0	4	0	0	0	0	0	0	0	0
638	Yorkshire Dales	8	control	737963	2016-04-26	17.66	0	0	0	0	0	0	94	0	0	0	0	0	0	0	0	0	0	0	0	0	0	0	0	0	0	0	0	0	0	0	0	0	0	0	0	0	0	0	0	0	0	0	1
509	North East Peak District	16	control	738052	2016-04-27	46.19	0	0	0	0	0	0	1	0	0	0	0	0	0	0	0	0	0	0	0	0	0	0	0	0	0	0	0	0	0	0	0	0	0	0	0	0	0	0	0	0	0	0	1
78696	North England	45	downstream	738076	2016-04-27	18.64	0	0	0	0	0	0	134	0	0	0	0	0	0	0	0	0	0	0	0	0	0	0	0	0	0	0	0	0	0	0	0	0	0	0	0	0	0	0	0	0	0	0	0
158760	North East Peak District	1	control	738133	2016-04-28	14.88	0	0	0	0	0	0	4	0	0	0	0	0	0	0	0	0	0	0	0	0	0	0	0	0	1	0	6	0	0	0	0	0	0	0	0	0	0	0	0	0	0	0	0
157547	South West Peak District	42	downstream	738147	2016-04-28	51.23	0	0	0	0	0	0	53	0	0	0	0	0	0	0	0	0	0	5	0	9	0	0	0	0	0	0	0	0	0	0	0	9	0	0	1	0	0	0	0	0	0	0	0
118	North East Peak District	1	downstream	738164	2016-04-28	22.34	0	0	0	0	0	15	128	11	3	0	0	0	0	0	0	0	0	0	0	0	0	0	0	0	3	0	0	0	0	0	0	0	0	0	0	0	0	0	0	0	0	0	0
163464	Yorkshire Dales	65	downstream	738237	2016-04-29	23.47	0	0	0	0	0	0	129	3	0	0	0	0	0	0	0	0	0	0	0	0	0	0	0	0	0	0	0	0	0	0	0	0	0	0	0	0	0	0	0	0	0	0	3
74823	South Pennines	61	control	738265	2016-04-29	10.7	0	0	0	0	0	0	71	0	0	0	0	0	0	0	0	0	0	0	0	0	0	0	0	0	9	0	0	0	0	0	0	0	0	0	0	0	0	0	0	0	0	0	0
159064	North England	47	control	738555	2016-05-05	4.39	0	0	0	0	75	0	36	0	0	0	0	0	0	0	0	0	0	0	0	0	0	0	0	0	1	0	0	0	0	0	0	0	0	0	0	0	0	0	0	0	0	0	0
418	North East Peak District	2	control	738567	2016-05-05	32.58	0	0	0	0	0	0	7	0	0	0	0	0	0	0	0	0	0	0	0	0	0	0	0	0	0	0	1	0	0	0	0	0	0	0	0	0	0	0	0	0	0	0	0
55583	Midlands	43	downstream	739062	2016-05-09	42.82	0	0	0	0	0	0	132	0	0	0	0	0	0	0	0	0	0	26	0	0	0	0	0	0	0	0	0	0	0	0	0	2	0	2	0	0	0	0	0	0	1	0	0
55714	Midlands	43	control	739070	2016-05-09	36.23	0	0	0	0	0	0	600	0	0	0	0	0	0	0	0	0	0	39	0	0	0	0	0	0	0	0	0	0	0	0	0	6	0	0	8	0	0	0	0	0	0	0	0
1169	South Pennines	12	downstream	739344	2016-05-10	24.23	0	0	0	0	0	0	45	6	0	0	0	0	0	0	0	0	0	0	0	0	0	0	0	0	2	0	0	0	0	0	0	0	0	0	0	0	0	0	0	0	0	0	0
1587	South Pennines	12	control	739777	2016-05-12	9.5	0	0	0	0	0	0	11	0	0	0	0	0	0	0	0	0	0	0	0	0	0	0	0	0	0	0	0	0	0	0	0	0	0	0	0	0	0	0	0	0	0	0	0
75896	North East Peak District	13	control	739782	2016-05-12	21.83	0	0	0	0	0	0	86	5	0	0	0	0	1	0	0	0	0	0	0	0	0	0	0	0	0	0	0	0	0	0	0	0	0	0	0	0	0	0	0	0	0	0	0
1584	North East Peak District	13	downstream	739796	2016-05-12	31.23	0	0	0	0	0	1	81	33	0	0	0	0	0	0	0	0	0	0	0	0	0	0	0	0	0	0	0	0	0	0	0	0	0	0	1	0	0	0	0	0	0	0	0
50378	South West Peak District	37	control	739977	2016-05-13	47.38	0	0	0	0	0	0	122	0	0	0	0	0	0	0	0	0	0	0	0	0	0	0	0	0	0	0	0	0	0	0	0	0	0	0	0	0	0	0	0	0	0	0	0
152858	North East Peak District	53	control	739984	2016-05-13	11.53	0	0	0	0	0	0	21	0	0	0	0	0	0	0	0	0	0	0	0	0	0	0	0	0	0	0	0	0	0	0	0	0	0	0	0	0	0	0	0	0	0	0	0
22	Yorkshire Dales	65	control	739987	2016-05-13	26.74	0	0	0	0	0	0	86	1	0	0	0	0	0	0	0	0	0	0	1	0	0	0	0	0	0	0	0	0	0	0	0	0	0	0	0	0	0	0	0	0	0	0	0
52186	South West Peak District	42	control	739998	2016-05-13	79.85	0	0	0	0	0	0	7	0	0	0	0	0	0	0	0	0	0	64	0	5	0	0	0	0	0	0	0	0	0	0	0	0	0	0	12	0	0	0	0	0	5	0	0
46924	South West Peak District	36	downstream	740381	2016-05-18	29.94	0	0	0	0	0	0	107	0	0	0	0	0	0	0	0	0	0	4	0	0	0	0	0	0	0	0	0	0	0	0	0	0	0	0	0	0	0	0	0	0	0	0	8
97161	South West Peak District	36	control	740389	2016-05-18	27.76	0	0	0	0	0	0	100	0	0	0	0	0	0	0	0	0	0	0	0	0	0	0	0	0	0	0	0	0	0	0	0	0	0	0	0	0	0	0	0	0	0	0	8
68458	South Pennines	56	downstream	740718	2016-05-24	50.36	0	0	0	0	0	0	54	2	0	0	0	0	0	0	0	0	0	1	52	33	0	0	0	0	0	0	0	0	0	0	0	0	0	0	6	0	0	0	0	0	0	0	0
473	North East Peak District	10	control	740728	2016-05-24	1.34	0	0	0	0	0	0	7	0	0	0	0	0	0	0	0	0	0	0	0	0	0	0	0	0	0	0	0	0	0	0	0	0	0	0	0	0	0	0	0	0	0	0	0
65118	Yorkshire Dales	49	control	740908	2016-05-27	12.94	0	0	0	0	0	0	124	1	0	0	0	0	0	0	0	0	0	0	0	0	0	0	0	0	3	0	0	0	0	0	0	0	0	0	1	0	0	0	0	0	0	0	0
68759	Yorkshire Dales	49	downstream	740913	2016-05-27	10.86	0	0	0	0	12	0	86	0	0	0	0	0	0	0	0	0	0	0	0	0	0	0	0	0	1	0	0	0	0	0	0	0	0	0	0	0	0	0	0	0	0	0	0
51392	Midlands	40	downstream	744384	2016-09-01	74.09	0	0	0	0	0	0	0	0	0	0	0	0	0	0	0	0	1	32	0	0	0	0	0	0	0	0	0	0	0	0	0	0	0	15	64	0	0	0	0	0	2	0	0
50031	Midlands	40	control	744388	2016-09-01	76.97	0	0	0	0	0	0	2	0	0	0	0	0	0	0	2	0	0	64	0	0	0	0	0	0	0	0	0	0	0	0	0	1	0	3	35	0	0	0	0	0	2	0	0
55714	Midlands	43	control	744536	2016-09-05	63.95	0	0	0	0	0	0	74	20	0	0	0	0	0	0	0	6	0	68	0	0	0	0	0	0	0	0	0	0	0	0	0	0	0	2	5	0	0	0	0	0	0	0	0
178505	South West Peak District	54	control	744625	2016-09-06	62.46	0	0	0	0	0	0	64	3	0	0	0	0	1	0	0	0	0	16	0	1	0	0	0	0	0	0	0	0	0	0	0	0	0	0	21	0	0	0	0	0	0	0	0
152858	North East Peak District	53	control	744627	2016-09-06	8.84	0	0	0	0	0	0	16	0	0	0	0	0	0	0	0	0	0	0	0	0	0	0	0	0	0	0	0	0	0	0	0	0	0	0	0	0	0	0	0	0	0	0	0
1580	North East Peak District	16	downstream	744655	2016-09-06	36.68	0	0	0	0	0	0	50	2	0	0	0	0	1	0	0	0	0	13	10	0	0	0	0	0	0	0	0	0	0	0	0	0	0	0	32	0	0	0	0	1	0	0	1
936	Yorkshire Dales	7	control	744852	2016-09-08	59.84	0	0	0	0	0	0	81	4	0	0	0	0	0	0	0	0	0	30	0	0	0	0	0	0	0	0	0	0	0	0	0	0	0	0	4	0	0	0	0	0	0	0	0
152682	Yorkshire Dales	7	downstream	744858	2016-09-08	51.18	0	0	0	0	0	0	109	30	0	0	0	0	0	0	0	0	0	30	0	0	0	0	0	0	0	0	0	0	0	0	0	0	0	7	47	0	0	0	0	0	0	0	0
47592	Midlands	38	downstream	744967	2016-09-09	74.75	0	0	0	0	0	0	23	0	0	0	0	0	0	0	8	0	0	60	0	39	0	0	0	0	0	0	0	0	0	1	3	0	0	4	20	0	0	0	0	0	0	0	0
51065	Midlands	38	control	744990	2016-09-09	68.04	0	0	0	0	0	0	10	0	0	0	0	0	0	0	10	0	0	75	0	0	0	0	0	0	0	0	0	0	0	0	0	0	0	1	2	0	0	0	0	0	0	0	0
69134	South Pennines	51	downstream	745178	2016-09-12	59.68	0	0	0	0	0	0	66	5	0	0	0	0	0	0	0	3	0	39	1	34	0	0	0	0	0	0	0	0	0	0	0	8	0	0	20	0	0	0	0	0	0	0	0
74823	South Pennines	61	control	745309	2016-09-14	15.07	0	0	0	0	0	0	66	1	0	0	0	0	0	0	0	0	0	2	0	0	0	0	0	0	3	0	0	0	0	0	0	0	0	0	0	0	0	0	0	0	0	0	0
1587	South Pennines	12	control	745310	2016-09-14	18.04	0	0	0	0	0	0	15	0	0	0	0	0	0	0	0	0	0	0	0	0	0	0	0	0	2	0	0	0	0	0	0	0	0	0	1	0	0	0	0	0	0	0	0
1169	South Pennines	12	downstream	745311	2016-09-14	13.79	0	0	0	0	0	0	52	0	0	0	0	0	3	0	0	0	0	2	0	0	0	0	0	0	0	0	1	0	0	0	0	0	0	0	0	0	0	0	0	0	0	0	0
254	South Pennines	61	downstream	745312	2016-09-14	52.65	0	0	0	0	0	0	42	1	0	0	0	0	1	0	0	0	0	43	0	0	0	0	0	0	0	0	0	0	0	0	0	0	0	0	111	0	1	0	0	0	0	0	0
158814	South Pennines	51	control	745332	2016-09-14	55.59	0	0	0	0	0	0	62	0	0	0	0	0	3	0	0	0	0	0	0	0	0	0	0	0	0	0	0	0	0	0	0	0	0	1	95	0	0	0	0	0	0	0	0
64262	North England	47	downstream	745352	2016-09-14	20.81	0	0	0	0	0	0	100	0	0	0	0	0	0	0	0	0	0	0	0	0	0	0	0	0	0	0	0	0	0	0	0	32	0	0	20	0	0	0	0	0	0	0	0
509	North East Peak District	16	control	745388	2016-09-14	27.69	0	0	0	0	0	0	180	0	0	0	0	0	0	0	0	0	0	0	0	0	0	0	0	0	0	0	0	0	0	0	0	0	0	0	0	0	0	0	0	0	0	0	0
142369	North East Peak District	10	downstream	745395	2016-09-14	32.32	0	0	0	0	0	0	127	0	0	0	0	0	0	0	1	2	0	9	0	23	0	0	0	0	0	0	0	0	0	0	0	0	0	0	7	0	0	0	0	0	0	0	0
1759	North England	18	control	745402	2016-09-09	24.48	0	0	0	0	3	0	239	0	0	0	0	0	0	0	0	0	0	0	0	0	0	0	0	0	0	0	0	0	0	0	0	0	0	0	20	0	0	0	0	0	0	0	1
473	North East Peak District	10	control	745479	2016-09-15	12.33	0	0	0	0	0	0	29	5	0	0	0	0	1	0	0	0	0	0	0	0	0	0	0	0	0	0	0	0	0	0	0	0	0	0	0	0	0	0	0	0	0	0	0
67808	South West Peak District	68	control	745587	2016-09-16	40.2	0	0	0	0	0	0	79	11	0	0	0	0	2	0	0	2	0	10	0	0	0	0	0	0	0	0	0	0	0	0	0	14	0	0	6	0	0	0	0	0	0	0	0
158760	North East Peak District	1	control	745647	2016-09-19	7.74	0	0	0	0	0	0	0	0	0	0	0	0	0	0	0	0	0	0	0	0	0	0	0	0	190	0	0	0	0	0	0	0	0	0	0	0	0	0	0	0	0	0	0
75896	North East Peak District	13	control	745648	2016-09-19	12.33	0	0	0	0	0	0	40	0	0	0	0	0	0	0	0	0	0	0	0	0	0	0	0	0	1	0	0	0	0	0	0	0	0	0	0	0	0	0	0	0	0	0	0
1584	North East Peak District	13	downstream	745649	2016-09-19	35.06	0	0	0	0	0	0	207	10	0	0	0	0	0	0	0	0	0	11	0	0	0	0	0	0	2	0	0	0	0	0	0	0	0	0	1	0	0	0	0	0	0	0	0
148	North East Peak District	2	downstream	745650	2016-09-19	29.95	0	0	0	0	0	0	345	3	0	0	0	0	0	0	0	1	0	14	0	3	0	0	0	0	0	0	0	0	0	0	0	0	0	0	24	0	0	0	0	0	0	0	0
200	North East Peak District	3	downstream	745651	2016-09-19	26.46	0	0	0	0	0	0	13	5	0	0	0	0	0	0	0	0	0	3	91	0	0	0	0	0	0	0	0	0	0	0	0	0	0	0	0	0	0	0	0	0	0	0	0
418	North East Peak District	2	control	745652	2016-09-19	7.37	0	0	0	0	0	0	84	0	0	0	0	0	0	0	0	0	0	1	0	0	0	0	0	0	0	0	0	0	0	0	0	0	0	0	0	0	0	0	0	0	0	0	0
1240	North East Peak District	3	control	745653	2016-09-19	12.5	0	0	0	0	0	0	55	0	0	0	0	0	0	0	0	0	0	0	0	0	0	0	0	0	0	0	0	0	0	0	0	0	0	0	0	0	0	0	0	0	0	0	24
118	North East Peak District	1	downstream	745655	2016-09-19	14	0	0	0	0	0	0	27	0	0	0	0	0	0	0	0	0	0	0	0	0	0	0	0	0	0	0	0	0	0	0	0	0	0	0	0	0	0	0	0	0	0	0	0
1758	North England	18	downstream	745667	2016-09-08	31.67	0	0	0	0	0	0	334	3	0	0	0	0	0	0	0	0	0	4	0	0	0	0	0	0	0	0	0	0	0	0	0	0	0	0	48	0	0	0	0	0	0	0	0
1576	Yorkshire Dales	60	downstream	745828	2016-09-20	6.75	0	0	0	0	0	0	91	0	0	0	0	0	0	0	0	0	0	0	0	0	0	0	0	0	0	0	0	0	0	0	0	0	0	0	5	0	0	0	0	0	0	0	0
1153	Yorkshire Dales	60	control	745829	2016-09-20	21.23	0	0	0	0	0	0	74	1	0	0	0	0	0	0	0	0	0	0	0	0	0	0	0	0	0	0	0	0	0	0	0	0	0	0	92	0	0	0	0	0	0	0	1
1594	Yorkshire Dales	17	downstream	745832	2016-09-20	24.15	0	0	0	0	0	0	153	0	0	0	0	0	1	0	0	0	0	3	2	0	0	0	0	0	0	0	0	0	0	0	0	0	0	0	1	0	0	0	0	0	0	0	1
175545	Yorkshire Dales	17	control	745833	2016-09-20	14.55	0	0	0	0	0	0	120	0	8	0	0	0	0	0	0	0	0	0	0	0	0	0	0	0	0	0	0	0	0	0	0	0	0	0	0	0	0	0	0	0	0	0	24
158753	South Pennines	15	control	745834	2016-09-20	1.68	0	0	0	0	0	0	76	0	0	0	0	0	0	0	0	0	0	0	0	0	0	0	0	0	0	0	0	0	0	0	0	0	0	0	0	0	0	0	0	0	0	0	0
1573	South Pennines	15	downstream	745836	2016-09-20	41.81	0	0	0	0	0	0	56	4	0	0	0	0	0	0	0	0	0	4	2	0	0	0	0	0	0	0	0	0	0	0	0	0	0	0	5	0	0	0	0	0	0	0	2
465	Yorkshire Dales	8	downstream	745933	2016-09-22	21.51	0	0	0	0	0	0	100	1	0	0	0	0	0	0	0	0	0	7	0	0	0	0	0	0	0	0	0	0	0	0	0	13	0	0	0	0	0	0	0	0	1	0	7
638	Yorkshire Dales	8	control	745935	2016-09-22	20.79	0	0	0	0	0	0	167	0	0	0	0	0	0	0	1	0	0	5	0	0	0	0	0	0	0	0	0	0	0	0	0	5	0	0	4	0	0	0	0	0	0	0	0
52427	Midlands	41	downstream	746180	2016-09-27	72.62	0	0	0	0	0	0	5	0	0	0	0	0	0	0	0	0	0	38	0	0	0	0	0	0	0	0	0	0	0	0	0	1	0	31	229	0	0	0	0	0	0	0	0
51073	Midlands	41	control	746210	2016-09-27	69.03	0	0	0	0	0	0	31	0	0	0	0	1	0	0	0	0	0	13	0	0	0	0	0	0	0	0	0	0	0	0	0	0	0	14	22	0	0	0	0	0	0	0	0
155046	Midlands	39	downstream	746229	2016-09-27	76.63	0	0	0	0	0	0	13	0	0	0	0	0	0	0	3	0	0	76	0	0	0	0	0	0	0	0	0	0	0	1	0	12	0	16	59	0	0	0	0	0	0	0	0
67595	North East Peak District	53	downstream	746323	2016-09-28	37.04	0	0	0	0	0	0	25	3	0	0	0	0	0	0	0	0	0	0	0	0	0	0	0	0	0	0	0	0	0	0	0	0	0	0	0	0	0	0	0	0	0	0	5
154138	North England	66	control	746562	2016-10-03	44.19	0	0	0	0	0	0	59	0	0	0	0	0	0	0	0	0	0	5	0	0	0	0	0	0	0	0	0	0	0	0	0	122	0	0	89	0	0	0	0	0	0	0	0
63372	North England	45	control	746589	2016-10-03	10.82	0	0	0	0	9	0	95	0	0	0	0	0	0	0	0	0	0	0	0	0	0	0	0	0	0	0	0	0	0	0	0	0	0	0	0	0	0	0	0	0	0	0	0
22	Yorkshire Dales	65	control	747001	2016-10-05	30.34	0	0	0	0	0	0	102	8	0	0	0	0	15	0	0	0	0	6	0	0	0	0	0	0	0	0	0	0	0	0	0	0	0	0	5	0	0	0	0	0	0	0	1
157164	North England	67	downstream	747079	2016-10-06	33.93	0	0	0	0	10	0	400	0	0	0	0	0	0	0	0	0	0	29	0	0	0	0	0	0	1	0	0	0	0	0	0	31	0	0	2	0	0	0	0	0	3	0	0
69430	South Pennines	56	control	747088	2016-10-06	21.19	0	0	0	0	0	0	39	0	0	0	0	0	1	0	0	0	0	2	0	1	0	0	0	0	0	0	0	0	0	0	0	0	0	0	3	0	0	0	0	0	0	0	0
68458	South Pennines	56	downstream	747093	2016-10-06	49.74	0	0	0	0	0	0	32	0	0	0	0	0	2	0	0	0	0	12	3	28	0	0	0	0	0	0	0	0	0	0	0	1	0	0	0	0	0	0	0	0	0	0	1
67572	North England	67	control	747098	2016-10-06	20.96	0	0	0	0	14	0	400	0	0	0	0	0	0	0	0	0	0	0	0	0	0	0	0	0	2	0	0	0	0	0	0	3	0	0	0	0	0	0	0	0	0	0	0
78696	North England	45	downstream	747101	2016-10-06	13.21	0	0	0	0	31	0	87	0	0	0	0	0	0	0	0	0	0	0	0	0	4	10	0	0	16	0	0	0	1	0	0	0	0	0	2	0	0	0	0	0	0	0	0
50020	Midlands	39	control	747283	2016-10-10	81.67	0	0	0	0	0	0	3	0	0	0	0	0	0	0	4	0	0	99	0	0	0	0	0	0	0	0	2	0	0	0	3	2	0	4	24	0	0	0	0	0	0	0	0
161362	South West Peak District	68	downstream	747346	2016-10-11	37.68	0	0	0	0	0	0	115	21	11	0	0	0	6	0	0	2	0	12	0	1	0	0	0	0	0	0	0	0	0	0	0	0	0	0	25	0	0	0	0	0	0	0	0
63855	North England	66	downstream	747427	2016-10-11	48.99	0	1	0	0	0	0	32	0	0	0	0	0	0	0	0	0	0	0	0	0	0	0	0	0	0	0	0	0	0	0	0	3	0	0	13	0	0	0	0	1	0	0	0
77580	South West Peak District	58	downstream	747751	2016-10-17	25.43	0	0	0	0	0	0	206	0	0	0	0	0	3	0	0	1	0	3	0	0	0	3	0	0	0	0	0	0	0	0	0	0	0	0	12	0	0	0	0	0	0	0	0
158815	South West Peak District	58	control	747756	2016-10-17	21.55	0	0	0	0	0	0	200	13	0	0	0	0	0	0	0	0	0	0	0	0	0	0	0	0	0	0	0	0	0	0	0	0	0	0	0	0	0	0	0	0	0	0	3
163464	Yorkshire Dales	65	downstream	747831	2016-10-18	43.83	0	0	0	0	0	0	58	3	0	0	0	0	0	0	0	0	0	5	1	6	0	0	0	0	0	0	0	0	0	0	0	1	0	1	1	0	0	0	0	0	0	0	3
51715	South West Peak District	37	downstream	748009	2016-10-20	69.54	0	0	0	0	0	0	10	0	0	0	0	0	0	0	0	0	0	15	2	35	0	0	0	0	0	0	1	0	0	0	0	0	0	3	7	0	0	0	0	0	0	0	0
50378	South West Peak District	37	control	748019	2016-10-20	46.36	0	0	0	0	0	0	103	0	0	0	0	0	0	0	0	0	0	1	0	0	0	0	0	0	0	0	0	0	0	0	0	0	0	0	33	0	0	0	0	0	0	0	0
52186	South West Peak District	42	control	748026	2016-10-20	73.06	0	0	0	0	0	0	24	0	0	0	0	0	0	0	0	0	0	58	0	0	0	0	0	0	0	0	0	0	0	0	0	0	0	0	28	0	0	0	0	0	3	0	0
157547	South West Peak District	42	downstream	748104	2016-10-21	61.23	3	0	0	0	0	0	45	0	0	0	0	0	0	0	0	0	0	3	2	0	0	0	0	0	0	0	0	0	0	0	0	0	0	0	8	0	0	0	0	0	0	0	0
159064	North England	47	control	748172	2016-10-24	17.97	0	0	0	0	25	0	220	0	0	0	0	0	0	0	0	0	0	2	0	0	0	0	0	0	5	0	0	0	0	0	0	0	0	0	0	0	0	0	0	0	0	0	0
55583	Midlands	43	downstream	748827	2016-11-04	67.64	0	0	0	0	0	0	48	0	2	1	0	0	0	0	2	4	0	72	0	0	0	0	0	0	0	0	1	0	0	0	0	4	0	9	66	0	0	0	0	0	0	0	0
97161	South West Peak District	36	control	748926	2016-11-07	17.78	0	0	0	0	0	0	126	0	0	0	0	0	0	0	0	0	0	0	0	0	0	0	0	0	0	0	0	0	0	0	0	0	0	0	2	0	0	0	0	0	0	0	11
46924	South West Peak District	36	downstream	748930	2016-11-07	36.41	0	0	0	0	0	0	89	0	0	0	0	0	0	0	0	0	0	5	1	0	0	0	0	0	0	0	0	0	0	0	0	0	0	0	4	0	0	0	0	0	0	0	1
65118	Yorkshire Dales	49	control	749025	2016-11-08	4.32	0	0	0	0	0	0	34	0	0	0	0	0	0	0	0	0	0	0	0	0	0	0	0	0	1	0	0	0	0	0	0	0	0	0	0	0	0	0	0	0	0	0	2
68759	Yorkshire Dales	49	downstream	749028	2016-11-08	34.25	0	0	0	0	56	0	193	0	0	0	0	0	7	0	0	0	0	7	0	0	0	0	0	0	0	0	0	0	0	0	0	4	0	0	4	0	0	0	0	0	0	0	0
[truncated: 336 more columns]
